1 Characterizing the reproductive transcriptomic correlates of acute dehydration in males in the desert-  
2 adapted rodent, *Peromyscus eremicus*

3

4

5 Lauren Kordonowy<sup>1\*</sup> and Matthew MacManes<sup>1+</sup>

6 1. University of New Hampshire Department of Molecular, Cellular and Biomedical Sciences

7 Durham, NH, USA

8 \* [lauren.kordonowy@unh.edu](mailto:lauren.kordonowy@unh.edu)

9 + [matthew.macmanes@unh.edu](mailto:matthew.macmanes@unh.edu)

10

11 **Corresponding Author:**

12 Lauren Kordonowy

13 Department of Molecular, Cellular, and Biomedical Sciences

14 University of New Hampshire

15 Rudman Hall (MCBS)

16 46 College Road

17 Durham, NH, 03824

18 (802) 735-5849

19 [lauren.kordonowy@unh.edu](mailto:lauren.kordonowy@unh.edu)

## 20 **Abstract**

21 The understanding of genomic and physiological mechanisms related to how organisms living in  
22 extreme environments survive and reproduce is an outstanding question facing evolutionary and  
23 organismal biologists. One interesting example of adaptation is related to the survival of mammals in  
24 deserts, where extreme water limitation is common. Research on desert rodent adaptations has focused  
25 predominantly on adaptations related to surviving dehydration, while potential reproductive physiology  
26 adaptations for acute and chronic dehydration have been relatively neglected. This study aims to explore  
27 the reproductive consequences of acute dehydration by utilizing RNAseq data in the desert-specialized  
28 cactus mouse (*Peromyscus eremicus*). Specifically, we exposed 22 male cactus mice to either acute  
29 dehydration or control (fully hydrated) treatment conditions, quasimapped testes-derived reads to a  
30 cactus mouse testes transcriptome, and then evaluated patterns of differential transcript and gene  
31 expression. Following statistical evaluation with multiple analytical pipelines, nine genes were  
32 consistently differentially expressed between the hydrated and dehydrated mice. We hypothesized that  
33 male cactus mice would exhibit minimal reproductive responses to dehydration; therefore, this low  
34 number of differentially expressed genes between treatments aligns with current perceptions of this  
35 species' extreme desert specialization. However, these differentially expressed genes include Insulin-  
36 like 3 (Insl3), a regulator of male fertility and testes descent, as well as the solute carriers Slc45a3 and  
37 Slc38a5, which are membrane transport proteins that may facilitate osmoregulation. Together, these  
38 results suggest that in male cactus mice, acute dehydration may be linked to reproductive modulation via  
39 Insl3, but not through gene expression differences in the subset of other *a priori* tested reproductive  
40 hormones. Although water availability is a reproductive cue in desert-rodents exposed to chronic  
41 drought, potential reproductive modification via Insl3 in response to acute water-limitation is a result  
42 which is unexpected in an animal capable of surviving and successfully reproducing year-round without

43 available external water sources. Indeed, this work highlights the critical need for integrative research  
44 that examines every facet of organismal adaptation, particularly in light of global climate change, which  
45 is predicted, amongst other things, to increase climate variability, thereby exposing desert animals more  
46 frequently to the acute drought conditions explored here.

47

48 **Keywords**

49 adaptation, testes, genetics, transcriptomics, differential expression, reproduction, physiology,  
50 dehydration, cactus mouse, *Peromyscus eremicus*

## 51 **Background**

52 For decades, evolutionary biologists have successfully described examples where natural  
53 selection has resulted in the exquisite match between organism and environment (*e.g.* Salinity  
54 adaptations in three-spine sticklebacks: Hohenlohe et al., 2010; Jones et al. 2012; high-altitude  
55 adaptations for hemoglobin in deer mice and humans: Storz et al., 2010, Lorenzo et al., 2015; and  
56 *Peromyscus* adaptations for multiple environments: Hoekstra et al., 2006; Bedford & Hoekstra, 2015;  
57 Munshi-South & Richardson, 2016). The match between organism and environment must be studied in  
58 the context of both components of fitness: survival and reproductive success, because both aspects of  
59 selection are critical to long term persistence in a given environment . Habitat specialists must possess  
60 phenotypes enabling survival and successful reproduction; therefore, cases where environmental  
61 selective pressures result in reduced reproductive success (*e.g.* Martin & Wiebe, 2004; Bolger, Patten &  
62 Bostock, 2005; Evans et al., 2010; Wingfield, Kelley & Angelier, 2011), but not survival, demand  
63 attention. Species occupying extreme environments are likely more vulnerable to the bifurcation of these  
64 two components of fitness. Moreover, long-term events like global climate change are predicted to  
65 increase climate variability and may enhance the challenges faced by species living on the fringes of  
66 habitable environments (Martin & Wiebe, 2004; Somero, 2010; Wingfield, Kelley & Angelier, 2011;  
67 Wingfield, 2013; Asres & Amha, 2014).

68 Deserts present extraordinary environmental impediments for habitation, including extreme heat,  
69 aridity, and solar radiation. Examples of well-described desert mammal behavioral adaptations are  
70 seasonal torpor (reviewed in Kalabukhov 1960; Geiser, 2010), nocturnality (*e.g.* Stephens & Tello,  
71 2009; Fuller et al., 2014) and burrowing (reviewed in Vorhies, 1945; Kelt, 2011) to avoid high  
72 temperatures and sun exposure. Desert mammals also exhibit a wide range of morphological  
73 adaptations, including large ears for effective heat dissipation (*e.g.* Schmidt-Nieslen, 1964; Hill &

74 Veghte, 1976), metabolic water production (*e.g.* MacMillen & Hinds, 1983; reviewed in Walsberg  
75 2000), and renal adaptations to minimize water-loss (*e.g.* Schmidt-Nielsen et al., 1948; Dantzler, 1982;  
76 Diaz, Ojeda & Rezenda, 2006). Although desert rodents must possess adaptations conferring survival  
77 *and* reproductive benefits, researchers have focused on their physiological adaptations for survival. For  
78 example, renal adaptations in species of Kangaroo rats (*Dipodomys* species) have been described and  
79 explored for over 60 years (Schmidt-Nielsen et al., 1948; Schmidt-Nielsen and Schmidt-Nielsen, 1952;  
80 Marra et al., 2012; Urity et al., 2012). While early research determined the renal physiology for  
81 Kangaroo rats (Schmidt-Nielsen et al., 1948; Schmidt-Nielsen and Schmidt-Nielsen, 1952; Vimtrup and  
82 Schmidt-Nielsen), recent research has focused on the genetic underpinnings of this phenotype (Marra et  
83 al., 2012; Urity et al., 2012; Marra, Romero & DeWoody, 2014; Marra et al., 2014), which is indicative  
84 of a larger methodological shift in the approach for examining adaptation.

85         Research in another desert-adapted rodent, *Peromyscus eremicus* (cactus mouse), has followed a  
86 somewhat different trajectory; however, it too has only pursued survival oriented physiological  
87 mechanisms (but see Kordonowy and MacManes, 2016; Kordonowy et al., 2017; MacManes, 2017).  
88 The ecology, physiology and behaviors of the cactus mouse in comparison with other *Peromyscus*  
89 species were summarized in 1968 (King, ed.), and the relationships between basal metabolic rate, body  
90 mass, and evaporative water loss were reviewed several decades later (MacMillen and Garland, 1989).  
91 Known desert adaptations for cactus mouse include nocturnality and torpor (reviewed in Veal and Caire,  
92 1979; Caire, 1999); however, the cactus mouse does not possess the same elaborate kidney structures  
93 responsible for renal adaptations in kangaroo rats (Dewey, Elias & Appel, 1966; MacManes 2016,  
94 *unpublished data*). The physiological renal adaptations in *P. eremicus* have not been described in detail,  
95 despite considerable explorations of other aspects of this species' biology (reviewed in Veal and Caire,  
96 1979; Caire, 1999). In order to initially characterize renal function of the cactus mouse, water

97 consumption measurements and electrophysical dehydration effects for this species have also recently  
98 been documented (Kordonowy et al., 2017). Because the renal mechanisms for mitigating renal water-  
99 loss in *P. eremicus* have not been determined, a comparative genetic approach may be instrumental for  
100 characterizing this species' adaptive kidney phenotype. To this end, MacManes and Eisen (2014)  
101 conducted a comparative analysis to find genes expressed in the kidney tissue of cactus mouse that were  
102 under positive selection relative to other mammals. MacManes (2017) also recently conducted  
103 differential gene expression analyses on cactus mouse kidneys subjected to acute dehydration to explore  
104 transcriptomic renal responses. However, the transcriptomic resources available for this species extend  
105 considerably beyond renal tissue; transcripts from cactus mouse (as well as numerous other *Peromyscus*  
106 species) have been heavily utilized to pursue questions related to multiple aspects of evolutionary  
107 biology (reviewed in Bedford and Hoekstra, 2015; Munshi-South and Richardson, 2016). Current  
108 investigations into cactus mouse desert-adaptive renal physiology include transcriptomic analyses  
109 (MacManes 2017); however, we extended this genetic approach by shifting the focus from adaptations for  
110 survival to include physiological adaptations for reproductive success (Kordonowy and MacManes,  
111 2016). The cactus mouse is an ideal system for investigating dehydration effects on reproduction, as  
112 well as potential reproductive adaptations for drought, given decades of study of reproductive biology,  
113 as well as more recent development of transcriptomic resources that include male reproductive tissues.

114 Substantial research has been done on the effects of various types of stress on reproduction (*e.g.*  
115 Wingfield & Sapolsky, 2003; Ahmed et al., 2015; Nargund, 2015; Wingfield, 2013); furthermore, the  
116 impacts of dehydration stress on reproduction in desert specialized rodents have been historically  
117 explored by studies documenting the impacts of water availability as a reproductive cue (*reviewed in*  
118 Schwimmer and Heim 2009; Bales and Hostetler, 2011). Specifically, some female desert rodents have  
119 shown evidence of reproductive attenuation due to water-limitation (Mongolian gerbil: Yahr and

120 Kessler, 1975; hopping mouse: Breed, 1975), and male Mongolian gerbils subject to dehydration had  
121 decreased reproductive tissue mass (Yahr and Kessler, 1975). In contrast, Shaw's jird, an Egyptian  
122 desert rodent, did not elicit perceivable reproductive response to water deprivation in either males or  
123 females (El, Bakry et al., 1999). Furthermore, water-supplementation studies among wild desert rodents  
124 resulted in prolonged breeding seasons in the hairy-footed gerbil and the four-striped grass mouse, but  
125 not in the Cape short-eared gerbil (Christian, 1979). Recent research has confirmed the importance of  
126 rainfall as a reproductive cue in the Arabian spiny mouse (Sarli et al., 2016), the Baluchistan gerbil  
127 (Sarli et al., 2015), Chessman's gerbil (Henry and Dubost, 2012) and the Spinifex hopping mouse  
128 (Breed and Leigh, 2011). The focus of this previous research was to investigate reproductive cues and  
129 consequences of water-limitation in desert rodents, namely how species have adapted breeding onset and  
130 cessation patterns to respond to water availability. Our current study experimentally tests reproductive  
131 responses to acute dehydration using a differential gene expression approach in the cactus mouse, which  
132 has not been previously evaluated for reproductive impacts of dehydration.

133 In nature, wild cactus mice are subjected to both acute and chronic dehydration, and  
134 understanding the reproductive effects of dehydration stress is an initial step for fully characterizing the  
135 suite of phenotypes enabling their successful reproduction. Given that this species has evolved in  
136 southwestern United States deserts and it breeds continuously throughout the year (Veal and Caire,  
137 1979; Caire, 1999), we predict that neither acute nor chronic water stress, while physiologically  
138 demanding, would be associated with reproductive suppression. To evaluate acute water stress  
139 reproductive tissue gene expression responses in the current study, we leveraged previous research that  
140 characterized the transcriptome of male *P. eremicus* reproductive tissues from functional and  
141 comparative perspectives (Kordonowy and MacManes, 2016). We extend upon this work by performing  
142 an RNAseq experiment to identify differentially expressed genes in testes between male *P. eremicus*

143 subjected to acute dehydration versus control (fully hydrated) animals in order to determine the impacts,  
144 if any, on male reproduction. We hypothesized that male cactus mice would exhibit minimal gene  
145 expression level reproductive responses to acute dehydration because they are highly desert-adapted and  
146 they breed year-round, including in times of chronic draught. Specifically, we predicted that genes  
147 linked to reproductive function would not be differentially expressed in the testes in response to acute  
148 dehydration. We pursued this line of research on the effects of dehydration on reproduction in cactus  
149 mouse in order to begin to address the need for additional studies focusing on physiological adaptations  
150 related to reproductive success in animals living in extreme, and changing, environments.

151

## 152 **Methods**

### 153 *Treatment Groups, Sample Preparation and mRNA Sequencing*

154 The cactus mice used for this study include only captive born individuals purchased from the  
155 *Peromyscus* Genetic Stock Center (Columbia, South Carolina). The animals at the stock center are  
156 descendant from individuals originally collected from a hot-desert location in Arizona more than 30  
157 years ago. The colony used in this study has been housed since 2013 at the University of New  
158 Hampshire in conditions that mimic temperature and humidity levels in southwestern US deserts, as  
159 described previously (Kordonowy & MacManes, 2016). Males and females are housed together, which  
160 provides olfactory cues to support reproductive maturation. Males do not undergo seasonal testicular  
161 atrophy, as indicated by successful reproduction throughout the year. The individuals used in this study  
162 were all of the same developmental stage – reproductively mature – which was assessed by observing  
163 that the testes had descended into the scrotum from the abdomen, making them visible.

164 Males that had free access to water prior to euthanasia are labeled as WET mice in our analyses.  
165 Mice that were water deprived, which we refer to as DRY mice, were weighed and then water deprived



166 for ~72 hours directly prior to euthanasia. All mice were weighed prior to sacrifice, and DRY mice were  
167 evaluated for weight loss during dehydration. Individuals in the study were collected between September  
168 2014 – April 2016.

169 Cactus mice were sacrificed via isoflurane overdose and decapitation in accordance with  
170 University of New Hampshire Animal Care and Use Committee guidelines (protocol number 130902)  
171 and guidelines established by the American Society of Mammalogists (Sikes et al., 2016). Trunk blood  
172 samples were collected following decapitation for serum electrolyte analyses with an Abaxis Vetscan  
173 VS2 using critical care cartridges (Abaxis). The complete methodology and results of the electrolyte  
174 study, as well as the reported measures of water consumption and weight loss due to dehydration are  
175 described fully elsewhere (Kordonowy et al., 2016). Rather, this study focused on differential gene  
176 expression between the testes of 11 WET and 11 DRY mice. Testes were harvested within ten minutes  
177 of euthanasia, placed in RNAlater (Ambion Life Technologies), flash-frozen in liquid nitrogen, and  
178 stored at -80° degree Celsius. A TRIZol, chloroform protocol was implemented for RNA extraction  
179 (Ambion Life Technologies). Finally, the quantity and quality of the RNA product was evaluated with  
180 both a Qubit 2.0 Fluorometer (Invitrogen) and a Tapestation 2200 (Agilent Technologies, Palo Alto,  
181 USA).

182 Libraries were made with a TruSeq Stranded mRNA Sample Prep LT Kit (Illumina), and the  
183 quality and quantity of the resultant sequencing libraries were confirmed with the Qubit and Tapestation.  
184 Each sample was ligated with a unique adapter for identification in multiplex single lane sequencing.  
185 We submitted the multiplexed samples of the libraries for processing on lanes at the New York Genome  
186 Center Sequencing Facility (NY, New York). Paired end sequencing reads of length 125bp were  
187 generated on an Illumina 2500 platform. Reads were parsed by individual samples according to their  
188 unique hexamer IDs in preparation for analysis.

## 189 *Assembly of Testes Transcriptome*

190 We assembled a testes transcriptome from a single reproductively mature male using the *de novo*  
191 transcriptome protocol described previously (MacManes, 2016). The testes transcripts were assembled  
192 with alternative methodologies utilizing several optimization procedures to produce a high-quality  
193 transcriptome; however, the permutations of this assembly process are described extensively elsewhere  
194 (MacManes, 2016; Kordonowy and MacManes, 2016). The testes transcriptome we selected was  
195 constructed as described below. The raw reads were error corrected using Rcorrector version 1.0.1  
196 (Song & Florea, 2015), then subjected to quality trimming (using a threshold of PHRED <2, as per  
197 MacManes 2014) and adapter removal using Skewer version 0.1.127 (Jiang et al, 2014). These reads  
198 were then assembled in the *de novo* transcriptome assembler BinPacker version 1.0 (Liu et al., 2016).  
199 We also reduced sequence redundancy to improve the assembly using the sequence clustering software  
200 CD-HIT-EST version 4.6 (Li & Godzik, 2006; Fu et al., 2012). We further optimized the assembly with  
201 Transrate version 1.0.1 (Smith-Unna et al., 2015) by retaining only highly supported contigs (cutoff:  
202 0.02847). We then evaluated the assembly's structural integrity with Transrate and assessed  
203 completeness using the vertebrata database in BUSCO version 1.1b1 (Simão et al., 2015). We  
204 quasimapped the raw reads to the assembly with Salmon version 0.7.2 (Patro, Duggal & Kingsford,  
205 2015) to confirm that mapping rates were high. Finally, the assembly was also annotated in dammit  
206 version 0.3.2, which finds open reading frames with TransDecoder and uses five databases (Rfam, Pfam,  
207 OrthoDB, BUSCO, and Uniref90) to thoroughly annotate transcripts  
208 (<https://github.com/camillescott/dammit>).

## 209 *Differential Gene and Transcript Expression Analyses*

210 Several recent studies have critically evaluated alternative methodologies for differential  
211 transcript and gene expression to determine the relative merits of these approaches (Gierlinski et al.,

212 2015; Schurch et al., 2016; Sonesson, Love & Robinson, 2016; Froussios et al., 2016). Sonesson and  
213 colleagues (2016) demonstrated that differential gene expression (DGE) analyses produce more accurate  
214 results than differential transcript expression (DTE) analyses. Furthermore, the differential gene  
215 expression approach is more appropriate than differential transcript expression for the scope of our  
216 research question, which is true of many evolutionary genomic studies (Sonesson et al., 2016). However,  
217 because both DTE and DGE approaches are widespread in current literature, we deemed it important to  
218 confirm that these methodologies yielded concordant results in the current study.

219 We utilized edgeR (Robinson, McCarthy & Smith, 2010; McCarthy, Chen & Smith, 2012) as our  
220 primary statistical software because Schurch and colleagues (2016) rigorously tested various packages  
221 for analyzing DGE, and edgeR performed optimally within our sample size range. While edgeR is a  
222 widely used statistical package for evaluating differential expression, we also confirmed our results with  
223 another popular package, DESeq2 (Love, Huber & Anders, 2014), in order to validate our findings.

224 We performed differential expression analyses with three alternative methodologies. Two  
225 analyses were conducted in R version 3.3.1 (R Core Team, 2016) using edgeR version 3.16.1, a  
226 Bioconductor package (release 3.4) that evaluates statistical differences in count data between treatment  
227 groups (Robinson, McCarthy & Smith, 2010; McCarthy, Chen & Smith, 2012). Our first method utilized  
228 tximport, an R package developed by Sonesson and colleagues (2016), which incorporates transcriptome  
229 mapping-rate estimates with a gene count matrix to enable downstream DGE analysis. The authors  
230 assert that such transcriptome mapping can generate more accurate estimates of DGE than traditional  
231 pipelines (Sonesson et al, 2016). While our first methodology evaluated differential gene expression, our  
232 second analysis used the transcriptome mapped read sets to perform differential transcript expression  
233 and identify the corresponding gene matches. The purpose of this second analysis was to evaluate  
234 whether the transcript expression results coincided with the gene expression results produced by the

235 same program, edgeR. Finally, our third methodology determined differential gene expression with  
236 tximport in conjunction with DESeq2 version 1.14.0 (Love, Huber & Anders, 2014), a Bioconductor  
237 package (release 3.4) which also evaluates statistical differences in expression. We performed this  
238 alternative DGE analysis with DESeq2 in order to corroborate our DGE results from edgeR. Thus, the  
239 results for all three differential expression analyses were evaluated to determine the coincidence among  
240 the genes identified as significantly different between the WET and DRY groups. These alternative  
241 differential expression methods are described in detail below.

242 We quasimapped each of the 11 WET and 11 DRY sample read sets to the testes transcriptome  
243 with Salmon version 0.7.2 to generate transcript count data. To perform the gene-level analysis in  
244 edgeR, we constructed a gene ID to transcript ID mapping file, which was generated by a BLASTn  
245 (Altschul et al., 1990; Madden, 2002) search for matches in the *Mus musculus* transcriptome  
246 (ensembl.org) version 7/11/16 release-85. We then imported the Salmon-generated count data and the  
247 gene ID to transcript ID mapping file into R using the tximport package (Soneson et al. 2016) to convert  
248 the transcript count data into gene counts. This gene count data was imported into edgeR for differential  
249 gene expression analysis (Robinson, McCarthy & Smith, 2010; McCarthy, Chen & Smith, 2012). We  
250 applied TMM normalization to the data, calculated common and tagwise dispersions, and performed  
251 exact tests ( $p < 0.05$ ) adjusting for multiple comparisons with the Benjamini-Hochburg correction  
252 (Benjamini & Hochburg, 1995) to find differentially expressed genes, which we identified in Ensembl  
253 (ensemble.org).

254 Next, we performed a transcript-level analysis using edgeR. To accomplish this, the Salmon-  
255 generated count data was imported into R and analyzed as was described above for the gene-level  
256 analysis in edgeR. After determining which transcript IDs were differentially expressed, we identified  
257 the corresponding genes using the gene ID to transcript ID matrix described previously. The

258 significantly expressed transcripts without corresponding gene matches were selected for an additional  
259 BLASTn search in the NCBI non-redundant nucleotide database  
260 (<http://blast.ncbi.nlm.nih.gov/Blast.cgi>). However, these results were not subjected to any additional  
261 analyses, because these matches were not consistent across all three differential expression analyses.  
262 This list of BLASTn search matches is provided in supplementary materials (DTEno-  
263 matchBLASTnSequences.md).

264 The third analysis used DESeq2 to conduct an additional gene-level test, using the same methods  
265 as described for the previous gene-level analysis, with the exception that data were imported into an  
266 alternative software package. We determined the significantly differentially expressed genes ( $p < 0.05$ )  
267 based on normalized counts and using the Benjamini-Hochburg correction (Benjamini & Hochburg,  
268 1995) for multiple comparisons. We only retained genes with a  $-1 < \log_2 \text{fold change} > 1$  in order to  
269 filter genes at a conservative threshold for differential expression based on our sample size (Schurch et  
270 al., 2016). This filtering was not necessary for either of the edgeR analyses because  $\log_2$  fold changes  
271 exceeded this threshold for the differentially expressed genes and transcripts ( $-1.3 < \log_2 \text{fold change} >$   
272 1.4, in all cases).

273 We also compared the  $\log_2$  fold change values (of treatment differences by mapped count) for  
274 each gene from the edgeR and DESeq2 gene-level analyses in a linear regression. This statistical test  
275 was performed in order to evaluate the degree of concordance between the two DGE analyses.  
276 Furthermore, we constructed a list of genes identified as differentially expressed by all three analyses,  
277 which were further evaluated for function as well as chromosomal location. These genes were also  
278 explored in STRING version 10.0 ([string-db.org](http://string-db.org)) to determine their protein-protein interactions (Snel et  
279 al., 2000; Szklarczyk et al., 2015).

280 Lastly, we performed an *a priori* test for DGE in edgeR on a small subset of nine genes encoding  
281 hormones and hormone receptors known to be involved in various aspects of reproductive functionality  
282 in male rodents. These genes are: steroidogenic acute regulatory protein (StAR), prolactin receptor  
283 (Prlr), luteinizing hormone/choriogonadotropin receptor (Lhgcr), inhibin (Inha), ghrelin (Ghrl), estrogen  
284 related receptor gamma (Essrg), estrogen related receptor alpha (Essra), androgen receptor (Ar), and  
285 activin receptor type-2A (Acvr2a). We retrieved the *Mus musculus* genomic sequences for these  
286 hormones and receptors from Ensembl (release 88: March 2017) and then executed BLASTn searches  
287 for the corresponding *Peromyscus eremicus* sequences in the testes transcriptome. The Ensembl gene  
288 identifiers (*Mus musculus*) corresponding to the *P. eremicus* transcripts were queried from the table of  
289 results produced by the edgeR DGE analysis to evaluate treatment differences in expression.

290

## 291 **Results**

### 292 *Data and Code Availability*

293 The testes transcriptome was assembled from a 45.8 million paired read data set. Additionally,  
294 there were 9-20 million paired reads for each of the 22 testes data sets used for the differential  
295 expression analysis (**Supplemental Table 1**), yielding 304,466,486 reads total for this analysis. The raw  
296 reads are available at the European Nucleotide Archive under study accession number PRJEB18655. All  
297 data files, including the testes un-annotated transcriptome, the dammit annotated transcriptome, and the  
298 data generated by the differential gene expression analysis (described below) are available on DropBox  
299 (<https://www.dropbox.com/sh/ffr9xrmjxj9md1m/AACpxjQNN-Jlf25qNdslfRSCa?dl=0>). These files will  
300 be posted to Dryad upon manuscript acceptance. All code for these analyses is posted on GitHub  
301 (<https://github.com/macmanes-lab/testesDGE>).

### 302 *Assembly of Testes Transcriptome*

303 The performance of multiple transcriptome assemblies was evaluated thoroughly, and the  
304 selected optimized testes assembly met high quality and completeness standards, and it also contains  
305 relatively few contigs and has high read mapping rates (**Table 1**). Therefore, this transcriptome was used  
306 for our differential expression analyses. The transcriptome was also annotated, and the complete  
307 statistics for this dammit annotation are provided in **Table 1**.

### 308 *Differential Gene and Transcript Expression Analyses*

309 Salmon quasimapping rates of all read datasets to the assembly were sufficiently high (range:  
310 81.46% - 87.02%; mean<sub>WET</sub> =84.41; mean<sub>DRY</sub> =83.81; **Supplemental Table 1**), indicating the  
311 successful generation of transcript count data for our differential expression analyses. The exact test  
312 performed for our gene-level analysis in edgeR indicated that fifteen genes reached statistical  
313 significance (after adjusting for multiple comparisons) for DGE between the WET and DRY treatment  
314 groups (**Supplemental Figure 1**). Specifically, seven genes were more highly expressed in WET  
315 individuals, and eight genes were more highly expressed in DRY individuals (**Table 2**).

316 We also performed an alternative transcript-level analysis using the referenced transcriptome  
317 mapped reads exclusively with edgeR. The exact test found 66 differentially expressed transcripts  
318 (**Supplemental Figure 2**), 45 of which were more highly expressed in the WET group, and 21 were  
319 more highly expressed in the DRY group (**Table 3**). 10 of these differentially expressed transcripts were  
320 consistent with differentially expressed genes from the edgeR DGE analysis. In addition, the  
321 significantly expressed transcripts without an Ensembl ID match (nine WET and nine DRY) were  
322 retrieved for performing an nt all species BLASTn search (<http://blast.ncbi.nlm.nih.gov/Blast.cgi>), and  
323 these results are in the supplementary materials.

324 The gene-level analysis conducted in DESeq2 yielded 215 significantly differentially expressed  
325 genes (**Supplemental Figure 3**), 67 of which were more highly expressed in the WET group, while 148



326 were highly expressed in the DRY group. However, only 20 of these genes remained when we filtered  
327 them with a  $-1 < \log_2 \text{ fold change} > 1$  to retain genes with a conservative threshold difference between  
328 treatment groups. This list of 20 genes yielded 16 genes more highly expressed in WET mice and four  
329 genes highly expressed in DRY mice (**Table 4**). Nine of these genes overlapped with those found to be  
330 significant in the previous two edgeR analyses.

331 To evaluate the correlation of  $\log_2$  fold change results for each gene (Ensembl ID) from the two  
332 DGE analyses (EdgeR and DESeq2), we performed a regression of these log values, and they were  
333 significantly correlated (**Figure 1**:  $\text{Adj-R}^2 = 0.6596$ ;  $F(1,14214) = 2.754 \times 10^4$ ;  $p < 2.2 \times 10^{-16}$ ). This  
334 further demonstrates the concordance of the DGE analyses in these two software packages.

335 To evaluate the degree to which the three analyses produced concordant results, we generated a  
336 list of genes which were found to be significantly differently expressed by treatment across all three  
337 analyses (**Supplemental Table 2**). There were six genes that were consistently highly-expressed in the  
338 WET group and three genes that were highly-expressed in the DRY group. The six highly-expressed  
339 WET genes are Insulin-like 3 (Insl3), Free-fatty acid receptor 4 (Ffar4), Solute carrier family 45 member  
340 3 (Slc45a3), Solute carrier family 38 member 5 (Slc38a5), Integrin alpha L (Itgal), and Transferrin (Trf).  
341 The three highly-expressed DRY genes are Ras and Rab Interactor 2 (Rin2), Insulin-like growth factor  
342 binding protein 3 (Igfbp3), and Connective tissue growth factor (Ctgf). Because the patterns of  
343 expression of these nine genes were corroborated by multiple methodologies, we are confident that they  
344 are differentially expressed between our treatments. Estimates of expression for these genes generated  
345 using the gene-level edgeR analysis are plotted in **Figure 2**.

346 The significantly differently expressed genes were evaluated for gene function and chromosomal  
347 location (**Table 5**). These genes occur throughout the genome; namely, they are located on different  
348 chromosomes. The diverse functions of each gene will be described below. In addition, we generated



349 STRING diagrams ([string-db.org](http://string-db.org)) to view the protein-protein interactions for each of these nine genes  
350 (Snel et al., 2000; Szklarczyk et al., 2015).

351 Slc38a5 and Slc45a3 are among the highly expressed genes in the WET group (they have lower  
352 expression in the DRY group); these two solute carriers are members of a large protein family that is  
353 responsible for cross-membrane solute transport (reviewed in Hediger et al., 2004; Hediger et al., 2013;  
354 Cesar-Razquin et al., 2015). Slc38a5 is involved sodium-dependent amino-acid transport, while Slc45a3  
355 is purported to transport sugars (Vitavska and Wiczorek, 2013; Schiöth, et al., 2013;  
356 <http://slc.bioparadigms.org/>), thereby playing an important potential role in maintaining water balance  
357 via management of oncotic pressures. Slc38a5 (**Figure 3a**) has interactions with multiple additional  
358 solute carriers, including Slc1A5, Slc36A2, Slc36A3, and Slc36A4. Slc38a5 also has an interaction with  
359 disintegrin and metalloproteinase domain-containing 7 (Adam7), which is involved in sperm maturation  
360 and the acrosome reaction (Oh et al., 2005). In contrast, Slc45a3 (**Figure 3b**) does not have known  
361 protein interactions with other solute carriers; however, this protein does interact with steroidogenic  
362 acute regulatory protein (StAR), which is critical in steroidogenesis (Christenson and Strauss III, 2001).  
363 Notably, our *a priori* DGE analysis did not demonstrate treatment differences in expression for StAR.

364 Insl3 was lower expressed in the DRY group, and this hormone purportedly regulates fertility in  
365 male and female mammals by preventing apoptosis of germ cells in reproductive organs of both sexes  
366 (Kawamura et al., 2004; Bathgate et al., 2012; Bathgate et al., 2013). In male rodents, Insl3 is critical to  
367 development by facilitating testicular descent, and it is also present in testes of adults, where it binds to  
368 relaxin family peptide receptor 2 (Rxfp2), also known as Lrg8 (Bathgate et al., 2012; Bathgate et al.,  
369 2013). Protein interaction data for Insl3 (**Figure 3c**) indicate that this hormone interacts with Rxfp2 and  
370 Rxfp1, as well as other proteins, including leptin (Lep), a pleiotropic hormone involved in reproduction,  
371 immunity, and metabolism (reviewed in Friedman, 2014).

372 Ffar4 was also down-regulated in the DRY group. Omega-3 fatty acid receptor 1 (O3Far1) is an  
373 alias of Ffar4, and it has roles in metabolism and inflammation (Moniri, 2016). This protein interacts  
374 with multiple other free fatty acid receptors and G-protein coupled receptors as well as Stanniocalcin 1  
375 (Stc1) (**Figure 3d**). Stc1 is involved in phosphate and calcium transportation (Wagner and Dimattia,  
376 2006); however, this protein's functional role in mice remains enigmatic (Chang et al, 2005).

377 Another of the lower expressed DRY group genes is Itgal (also known as CDa11a), which has  
378 multifaceted roles in lymphocyte-mediated immune responses (Bose et al., 2014). Concordantly, the  
379 protein interactions with Itgal (**Figure 3e**) include numerous proteins integral to immunity, such as  
380 Intracellular adhesion molecules (specifically, ICAM1,2,4), which are expressed on the cell surface of  
381 immune cells and endothelial cells. Itgal is a receptor for these ICAM glycoproteins, which bind during  
382 immune system responses (reviewed in Albelda, Smith and Ward, 1994). However, an additional role of  
383 intercellular adhesion molecules has been proposed in spermatogenesis, whereby ICAMs may be  
384 integral to transporting non-mobile developing sperm cells through the seminiferous epithelium (Xiao,  
385 Mruk and Cheng, 2013).

386 The final gene with lower expression levels in the DRY treatment is Trf, which modulates the  
387 amount of free-iron in circulation and binds to transferrin receptors on the surface of erythrocyte  
388 precursors to deliver iron (reviewed in Gkouvastos Papanikolaou and Pantopoulos, 2012). Trf interacts  
389 with multiple proteins (**Figure 3f**) involved in iron transport and uptake, including Steap family member  
390 3 (Steap3), hephaestin (Heph), cerulopslamin (Cp), Solute carrier protein 40 member 1 (Slc40A1), and  
391 several H<sup>+</sup> ATPases. Furthermore, Trf is linked to apolipoprotein A-1 (Apoa1), which interacts with  
392 immunoglobulin in a complex named sperm activating protein (Spap) to activate the motility of sperm  
393 when it inhabits the female genital tract (Akerlof et al., 1991; Leijonhufvud, Akerlof and Pousette,  
394 1997).

395           One of the highly expressed genes in the DRY group is Rin2, which is involved in endocytosis  
396 (reviewed in Doherty and McMahon, 2009) and membrane trafficking through its actions as an effector  
397 protein for the GTPases in the Rab family within the Ras superfamily (reviewed in Stenmark and  
398 Olkkonen, 2001). Rin2 protein-protein interactions (**Figure 4a**) include Ras related protein Rab5b and  
399 Rab5b, which are involved in vesicle transport as well as vasopressin-regulated water reabsorption. This  
400 mechanism for water reabsorption via Aquaporin 2 (Aqp2) in the kidney has been thoroughly reviewed  
401 by Boone and Deen (2008) and Kwon and colleagues (2013).

402           The second gene highly expressed in the DRY group is Igfbp3, which modulates the effects of  
403 insulin growth factors. Thus, the protein directly interacts (**Figure 4b**) with insulin growth factors 1 and  
404 2 (Igf1, Igf2), which are responsible for increasing growth in most tissues (reviewed in le Roth 1997;  
405 Jones and Clemmons, 2008). Ctgf was also highly expressed in the DRY group, and this protein is  
406 responsible for increased fibrosis and extracellular matrix formation (Reviewed in Moussad and  
407 Brigstock, 2000). The protein interactions for Ctgf (**Figure 4c**) include many transcription activators in  
408 the Hippo signaling pathway, including multiple TEA domain transcription factors (Tead1, 2, 3 and 4),  
409 WW domain containing transcription regulator 1 (Wwtr1), as well as Yes-associated protein 1 (Yap1),  
410 which is responsible for both increasing apoptosis and preventing cell proliferation to mitigate tumor  
411 growth and control organ size (Reviewed in Pan, 2010).

412           The *a priori* edgeR DGE analysis for the genes encoding nine reproductive hormones and  
413 hormone receptors) did not reveal any statistically significant differences between the WET and DRY  
414 mice. The log fold change values and corresponding p-values for these genes are in the analysis posted  
415 on GitHub. The patterns for these genes by treatment are shown in **Figure 5**.

416

417 **Discussion**

418           This is the first study to evaluate gene expression levels of a reproductive tissue (testes) in  
419 response to acute dehydration in a desert-specialized rodent, *Peromyscus eremicus* (cactus mouse). Our  
420 results demonstrate differential expression of *Insl3*, which is a gene linked to reproduction, but not for a  
421 small subset of other reproductive hormone (and hormone receptor) genes. We also found expression  
422 differences in two solute carrier proteins, which is consistent with previous findings asserting the  
423 importance of this protein family for osmoregulation in desert rodents. Our findings lead us to  
424 hypothesize that reproductive function may be modified via *Insl3* in acutely dehydrated mice. Any  
425 transcriptomic indication of potential reproductive modification in response to acute dehydration is  
426 surprising, given that this is not consistent with our understanding of *P. eremicus* as a desert specialist  
427 capable of breeding year-round in the wild. However, future studies must determine the physiological  
428 effects of decreased *Insl3* expression on acutely dehydrated cactus mice. While acute dehydration is less  
429 common than chronic dehydration for desert mammals, given their ecology, it is a selective force they  
430 must overcome. Indeed, throughout much of the described range of the cactus mouse, rainfall events  
431 may occur several times per year. Cactus mice, and many other rodents, are known to rehydrate during  
432 these rainfall events (MacManes, *personal observation*). Following rehydration, cactus mice experience  
433 acute dehydration, followed by a steady state of chronic dehydration. The reproductive responses of  
434 cactus mice to these acute and chronic dehydration events are unknown; therefore, this study describes  
435 the transcriptomic effects of acute dehydration in testes.

436           *Insl3*, which is believed to be a hormonal regulator of fertility among mammals of both sexes,  
437 inhibits germ line apoptosis in the testes (Kawamura et al., 2004; Bathgate et al., 2012; Bathgate et al.,  
438 2013). Within adult rodent testes, luteinizing hormone (LH) stimulates expression of *Insl3* in Leydig  
439 cells, and *Insl3* binds to *Lrg8* in seminiferous tubules, which results in inhibited apoptosis of germ-line  
440 cells, thus increasing their availability (Kawamura et al., 2004). In addition, a study using murine

441 Leydig cells demonstrated that Insl3 administration increased testosterone production (Pathirana et al.,  
442 2012). The precise mechanistic role of ISNL3 in modulating fertility is still being elucidated; however,  
443 researchers assert that this hormone is an important regulator of fertility in males and females (*reviewed*  
444 *in* Bathgate et al., 2012). Indeed, recent research has investigated the utility of Insl3 as an indicator of  
445 mammalian fertility (e.g. *in humans*: Kovac and Lipshultz, 2013; *in bulls*: Pitia et al., 2016). Insl3 is also  
446 critical for the first phase of testicular descent, the transabdominal phase, which occurs during fetal  
447 development in rodents; but Insl3 does not appear to be involved in the inguinoscrotal phase which  
448 happens in sexually immature or inactive male rodents (reviewed in Hutson et al., 2015). Lower Insl3  
449 expression in the testes of acutely dehydrated mice leads us to suggest that fertility may be attenuated  
450 due to acute water deprivation. However, future work characterizing the functional consequences of  
451 Insl3 down-regulation, including direct measurements of sperm numbers and function, is needed to  
452 causatively demonstrate reproductive attenuation. Specifically, does the number or quality of sperm  
453 decrease, and does this decrease reduce the probability of successful fertilization? Moreover, what are  
454 the temporal dynamics of reproductive suppression? Logically, species with core reproductive functions  
455 that are suppressed by dehydration seem likely to be rapidly outcompeted by others lacking such  
456 limitations. Given this assertion, research characterizing the reproductive correlates of chronic  
457 dehydration is a logical extension of this work, although doing so is beyond the scope of this study.

458 Solute carrier proteins, specifically Slc45a3 and Slc38a5, are downregulated in acute  
459 dehydration. These genes are part of a large family essential for transferring solutes across membranes  
460 (reviewed in Hediger et al., 2004; Hediger et al., 2013; Cesar-Razquin et al., 2015). Another member of  
461 this family, Solute carrier family 2 member 9 (Slc2A9), has been found to be undergoing positive  
462 selection in studies on kidney transcriptomes of cactus mouse (MacManes & Eisen, 2014) and of other  
463 desert rodents (Marra, Romero & DeWoody, 2014). Our previous work with the male reproductive

464 transcriptome of cactus mouse found evidence for positive selection in two additional solute carrier  
465 proteins: Slc15a3 and Slc47a1 (Kordonowy and MacManes, 2016). A recent differential gene expression  
466 study in cactus mouse kidneys found that Slc2A1 and Slc8A1 also showed responses to acute  
467 dehydration (MacManes, 2017). Therefore, our current findings that two solute carrier proteins are  
468 lower expressed in the DRY treatment group is consistent with previous research in the kidney and male  
469 reproductive transcriptomes for this species. This leads us to further support the hypothesis originally  
470 proposed by Marra, Romero & DeWoody (2014) that this protein family is intrinsic to osmoregulation in  
471 desert rodents. Indeed, the findings of MacManes and Eisen (2014), Kordonowy and MacManes (2016),  
472 and MacManes (2017) also lend support to the essential role of solute carrier proteins for maintaining  
473 homeostasis in the desert specialized cactus mouse.

474 In addition to their well characterized role in the maintenance of water and electrolyte balance,  
475 the differential expression of solute carrier proteins may have important reproductive consequences,  
476 particularly as they relate to hormone secretion. Indeed, the interaction between Slc38a5 and Adam7 is  
477 relevant, because Adam7 is involved in sperm maturation and the acrosome reaction (Oh et al., 2005).  
478 Furthermore, the protein-protein interactions between Slc45a3 with StAR and between Insl3 and Lep are  
479 of particular interest because both StAR and Lep are integral to reproduction, as well as to homeostasis  
480 (reviewed in Christenson and Strauss III, 2001; Anuka et al., 2013; Friedman, 2014; Allison and Myers,  
481 2014). However, our a priori DGE analysis evaluating StAR, and other reproductive hormones, did not  
482 show evidence of expression changes. Thus, the protein interactions with reproductive implications are  
483 not restricted to solute carrier proteins. The protein relationships between Itgal and intercellular adhesion  
484 molecules are also noteworthy with respect to research hypothesizing an integral role for ICAMs in  
485 spermatogenesis (Xiao, Mruk and Cheng, 2013). Furthermore, Trf is linked to ApoA1, which is a critical  
486 component of sperm activating protein (Akerlof et al., 1991; Leijonhufvud, Akerlof and Pousette, 1997).

487 While the relationship between these differentially expressed genes and the hormones involved in  
488 reproductive function are currently poorly-characterized, our findings that genes integral to sperm  
489 development and activation interact with genes differentially expressed in acute dehydration may  
490 indicate that, contrary to our expectations, acute dehydration is linked to reproductive modulation in the  
491 cactus mouse. However, functional studies will be necessary to elucidate the connection between these  
492 genes and physiological responses to dehydration. This is particularly important because many  
493 hormones have pleiotropic effects, and further mechanisms of action unrelated to reproduction may be  
494 elucidated for these proteins in *Peromyscus eremicus*.

495 In contrast to genes that are down-regulated in dehydration, the genes that were upregulated in  
496 the DRY group are known to be responsible for water homeostasis and cellular growth. The significance  
497 of *Rin2* is notable, because this protein is an effector for *Rab5*, which as a GTPase involved in  
498 vasopressin-regulated water reabsorption, a critical homeostatic process mediated through the *Aqp2*  
499 water channel in kidneys (Boone and Deen, 2008; Kwon et al., 2013). It is not surprising that genes in  
500 addition to solute carrier proteins, which are implicated in alternative processes for water homeostasis,  
501 are differentially expressed in response to water limitation. The other two genes that are up-regulated in  
502 the DRY treatment are indicative of modulated growth due to water limitation. Specifically, *Igfb3*  
503 interacts directly with insulin growth factors responsible for tissue growth (le Roth 1997; Jones and  
504 Clemmons, 2008), and *Ctgf* is linked with numerous transcription factors in the Hippo signaling  
505 pathway, which modulates apoptosis, proliferation and organ size control (Pan, 2010).

506 To complement our male centric research, future studies should evaluate dehydration induced  
507 gene expression differences in female reproductive tissues, particularly in the uterus and ovaries during  
508 various reproductive stages. Indeed, given that the physiological demands of reproduction are  
509 purportedly greater in females, though this is controversial, (Bateman's Principle: *proposed in* Bateman,



510 1948; *addressed in* Trivers, 1972; *reviewed in* Knight, 2002; *tested in* Jones et al., 2002; 2005; Collet et  
511 al., 2014), we would expect to see a greater degree of reproductive suppression in females. While such  
512 work is beyond the scope of this manuscript, we hope that future research will evaluate female Cactus  
513 mouse reproductive responses to dehydration.

514 Our findings are pertinent to physiological research in other desert-rodents showing reproduction  
515 suppression in response to water limitation (*reviewed in* Bales and Hostetler, 2011), specifically, in male  
516 and female Mongolian gerbils (Yahr and Kessler, 1975) and female hopping mice (Breed, 1975). The  
517 integral role of water as a reproductive cue for desert-rodents has also been demonstrated in water-  
518 supplementation studies (*reviewed in* Bales and Hostetler, 2011; Christian, 1979) as well as research on  
519 the effects of desert rainfall (Breed and Leigh, 2011; Henry and Dubost, 2012; Sarli et al., 2015; Sarli et  
520 al., 2016). Thus, Schwimmer and Haim (2009) asserted that reproductive timing is the most  
521 evolutionarily important adaptation for desert rodents. Furthermore, desert rodent research supporting a  
522 dehydration driven reproductive suppressive pathway mediated by arginine vasopressin (*reviewed in*  
523 Schwimmer and Haim, 1999; tested in Tahri-Joutei and Pointis, 1988a; 1988b; Shanas and Haim, 2004;  
524 Wube et al., 2008; Bukovetzky et al., 2012a; Bukovetzky et al., 2012b) is somewhat analogous to our  
525 study linking decreased *Insl3* expression in testes with dehydration, in that both findings represent non-  
526 traditional hormonal modulation of reproduction. We propose that future studies thoroughly explore  
527 physiological consequences for non-traditional hormonal pathways in response to dehydration in desert  
528 rodents, as well as well-established reproductive modulatory hormones in the hypothalamic-pituitary-  
529 gonadal axis.

530 Emerging from this work is a hypothesis related to the reproductive response to water stress in  
531 the cactus mouse, and perhaps other desert rodents. Specifically, we hypothesize that acute dehydration  
532 may be related to reproductive mitigation; however, we hypothesize that chronic dehydration is not.



533 Indeed, it is virtually oxymoronic to suggest that chronic dehydration, which is the baseline condition in  
534 desert animals, has negative consequences for reproductive success. Indeed, desert rodents dynamically  
535 respond to water-availability to initiate and cease reproductive function. Generating an integrative,  
536 systems-level understanding of the reproductive responses to both acute and chronic dehydration across  
537 desert-adapted rodent is required for testing our hypothesis. While understanding the renal response to  
538 dehydration is critical for making predictions about survival, understanding the reproductive correlates  
539 is perhaps even more relevant to evolutionary fitness. This study, to the best of our knowledge, is the  
540 first to describe the reproductive correlates of water-limitation in the cactus mouse, and the first to use a  
541 differential gene expression approach to evaluate reproductive tissue responses to drought. Furthermore,  
542 this study contributes to a research aim to determine whether novel physiological reproductive  
543 adaptations are present in male Cactus mouse (Kordonowy and MacManes, 2016). Developing a  
544 comprehensive understanding of reproductive responses to drought, and also the mechanisms underlying  
545 potential physiological adaptations, is necessary if we are to understand how increasing environmental  
546 variability due to climate change may modify the distribution of extant organisms.

547

## 548 **Conclusions**

549 The genetic mechanisms responsible for physiological adaptations for survival and reproduction  
550 in deserts remain enigmatic. Desert rodent research has focused primarily on physiological adaptations  
551 related to survival, specifically on renal adaptations to combat extreme water-limitation. In contrast,  
552 while previous studies have investigated reproductive effects of water-limitation in desert rodents, the  
553 underlying mechanisms for physiological adaptations for reproduction during acute and chronic  
554 dehydration are unknown. Furthermore, ours is the first study to evaluate reproductive transcriptomic  
555 responses to water limitation in a desert-rodent, the cactus mouse. To this end, we characterized the

556 reproductive correlates of acute dehydration in this desert-specialized rodent using a highly replicated  
557 RNAseq experiment. In contrast to expectations, we describe a potential signal of reproductive  
558 modulation in dehydrated male cactus mouse testes. Specifically, dehydrated mice demonstrated  
559 significantly lower expression of *Insl3*, which is a canonical regulator of fertility (and testes descent).  
560 Lower expression was also found in *Slc45a3* and *Slc38a5*, lending further credence to the important role  
561 of solute carrier proteins for osmoregulation in the cactus mouse. While the low number of differentially  
562 expressed genes between acutely dehydrated and control mice might otherwise have suggested that this  
563 species is relatively unaffected by acute water-limitation, the diminished expression of *Insl3* in  
564 dehydrated mice leads us to propose that acute dehydration may compromise reproductive function via  
565 decreased fertility. Indeed, we hypothesize that non-traditional reproductive hormone pathways, such as  
566 those involving *Insl3* or AVP (which has elicited suppressive reproductive responses in other desert  
567 rodent research), warrant further investigation in studies evaluating the reproductive effects of acute and  
568 chronic dehydration. Although future research must experimentally evaluate the potential functional  
569 relationship between *Insl3* expression pattern and reproductive function and fertility, our findings that  
570 acute-dehydration alters *Insl3* expression may be concerning, particularly with respect to global climate  
571 change. Climate change driven increased variabilities in weather patterns may result in a greater  
572 frequency of acute water-stress, which could result in reduced reproductive function for the cactus  
573 mouse. In addition, because global climate change is predicted to shift habitats toward extremes in  
574 temperature, salinity, and aridity, and to alter species ranges, an enhanced understanding of the  
575 reproductive consequences of these changes, and of the potential for organisms to rapidly adapt, may  
576 enable us to effectively conserve innumerable species facing dramatic habitat changes.

## 577 **List of abbreviations**

578 Differential Gene Expression (DGE)

579 Differential Transcript Expression (DTE)

580 Dehydrated Treatment Group (DRY)

581 Control Treatment Group (WET)

582

583

584 **Declarations**

585 *Ethics approval and consent to participate*

586 All animal care procedures were conducted in accordance with University of New Hampshire Animal

587 Care and Use Committee guidelines (protocol number 130902) and guidelines established by the

588 American Society of Mammalogists (Sikes et al., 2016).

589 *Consent for publication*

590 Not applicable.

591 *Availability of data and materials:*

592 The raw reads are available at the European Nucleotide Archive under study accession number

593 PRJEB18655. All data files, including the testes un-annotated transcriptome, the dammit annotated

594 transcriptome, and the data generated by the differential gene expression analysis (described below) are

595 available on DropBox (<https://www.dropbox.com/sh/ffr9xrmjxj9md1m/AACpxjQNn->

596 [Jlf25qNdsIfRSCa?dl=0](https://www.dropbox.com/sh/ffr9xrmjxj9md1m/AACpxjQNn-Jlf25qNdsIfRSCa?dl=0)). These files will be posted to Dryad upon manuscript acceptance. All code for

597 these analyses is posted on GitHub (<https://github.com/macmanes-lab/testesDGE>).

598 *Competing Interests*

599 The authors declare that they have no competing interests.

600 *Funding*

601• This work was supported by a National Science Foundation award to Dr. Matthew MacManes (NSF IOS  
602 1455960).

603 *Authors' Contributions*

604 LK and MDM both contributed to the data collection, data generation, bioinformatics, analyses,  
605 interpretation, and writing of this manuscript.

606 *Acknowledgments*

607 We would like to acknowledge the MacManes laboratory, including graduate student Andrew Lang, and  
608 the undergraduate students in the laboratory. We also acknowledge Dr. Paul Tsang for advice on the  
609 reproductive endocrinology described in the discussion.

610

611 **References:**

612 Ahmed A, Tiwari RJ, Mishra GK, Jena B, Dar MA, Bhat AA. Effect of environmental heat stress on  
613 reproductive performance of dairy cows- a review. *International Journal of Livestock Research*  
614 2015;5(4):10-18. doi: 10.5455/ijlr.20150421122704.

615 Akerlof E, Jornvall H, Slotte H, Pousette A. Identification of apolipoprotein A1 and immunoglobulin as  
616 components of a serum complex that mediates activation of human sperm motility. *Biochemistry*  
617 1991;30:8986-8990. doi:10.1021/bi00101a011.

618 Albelda SM, Smith CW, Ward PA. Adhesion molecules and inflammatory injury. *The FASEB Journal*  
619 1994;8(8):504-512.

- 620 Allison MB, Myers MG Jr. 20 years of leptin: connecting leptin signaling to biological function. Journal  
621 of Endocrinology 2014;223(1): T25-T35. doi: 10.1530/JOE-14-0404.
- 622 Altschul SF, Gish W, Miller W, Myers EW, Lipman DJ. Basic local alignment search tool. Journal of  
623 Molecular Biology 1990;215(3):403-10. doi:10.1016/S0022-2836(05)80360-2.
- 624 Anuka E, Gal M, Stocco DM, Orly J. Expression and roles of steroidogenic acute regulatory (StAR)  
625 protein in 'non-classical', extra-adrenal and extra-gonadal cells and tissues. Molecular and Cellular  
626 Endocrinology 2013;371(1-2):47-61. doi: 10.1016/j.mce.2013.02.003.
- 627 Asres A, Amha N. Physiological adaptation of animals to the change of environment: a review. Journal  
628 of Biology, Agriculture and Healthcare 2014;4(25): 146-151.  
629 <http://www.iiste.org/Journals/index.php/JBAH/article/view/17387>
- 630 Bales KL, Hostetler CM. Hormones and Reproductive Cycles in Rodents. In Norris DO, Lopez KH,  
631 editors. Hormones and Reproduction of Vertebrates: Volume 5 Mammals. London: Academic Press  
632 (Elsevier);2011. p. 215-240.
- 633 Bateman AJ. Intra-sexual selection in *Drosophila*. Heredity 1948;2:349-368.
- 634 Bathgate RAD, Zhang S, Hughes RA, Rosengren KJ, Wade JD. The Structural Determinants of Insulin-  
635 Like Peptide 3 Activity. Frontiers in Endocrinology 2012;3:11. doi:10.3389/fendo.2012.00011.
- 636 Bathgate RAD, Halls ML, van der Westhuizen ET, Callander GE, Kocan M, Summers RJ. Relaxin  
637 family peptides and their receptors. Physiological Reviews 2013;93(1):405-480.  
638 doi: 10.1152/physrev.00001.2012

- 639 Bedford NL, Hoekstra HE. The Natural History of Model Organisms: *Peromyscus* mice as a model for  
640 studying natural variation. *eLife* 2015;4:e06813. doi:10.7554/eLife.06813.
- 641 Benjamini Y, Hochberg Y. Controlling the false discovery rate: a practical and powerful approach to  
642 multiple testing. *Journal of the Royal Statistical Society: Series B (Methodological)* 1995;57(1):289-30.  
643 <http://www.jstor.org/stable/2346101>
- 644 Bolger DT, Patten MA, Bostock DC. Avian reproductive failure in response to an extreme climatic  
645 event. *Oecologia* 2005;142(3):398-406. doi: 10.1007/s0042-004-1734-9.
- 646 Boone M, Deen PMT. Physiology and pathophysiology of the vasopressin-regulated renal water  
647 reabsorption. *Pflugers Archiv* 2008;456(6):1005-1024. doi: 10.1007/s00424-008-0498-1
- 648 Bose TO, Colpitts SL, Pham Q-M, Puddington L, Lefrancois L. CD11a is essential for normal  
649 development of hematopoietic intermediates. *Journal of Immunology* 2014;193:2863-2872.  
650 doi: 10.4049/jimmunol.1301820.
- 651 Breed WG. Environmental factors and reproduction in the female hopping mouse, *Notomys alexis*. *The*  
652 *Journal of the Society for Reproduction and Fertility* 1975;45:273-281. doi: 10.1530/jrf.0.0450273.
- 653 Breed WG, Leigh CM. Reproductive biology of an old endemic murid rodent of Australia, the Spinifex  
654 hopping mouse, *Notomys alexis*: adaptations for life in the arid zone. *Integrative Zoology* 2011;6:321-  
655 333. doi: 10.1111/j.1749-4877.2011.00264x
- 656 Bukovetzky E, Fares F, Schwimmer H, Haim A. Reproductive and metabolic responses of desert  
657 adapted common spiny male mice (*Acomys cahirinus*) to vasopressin treatment. *Comparative*  
658 *Biochemistry and Physiology, Part A* 2012a;162(4):349-356. <http://doi.org/10.1016/j.cbpa.2012.04.007>

- 659 Bukovetzky E, Schwimmer H, Fares F, Haim A. Photoperiodicity and increasing salinity as  
660 environmental cues for reproduction in desert adapted rodents. *Hormones and Behavior* 2012b;61(1):  
661 84-90. <http://doi.org/10.1016/j.yhbeh.2011.10.006>
- 662 Caire W. Cactus mouse. In Wilson D, Ruff S, editors. *The Smithsonian Book of North American*  
663 *Mammals*. Washington, D.C.: Smithsonian Institution Press; 1999. p. 567-568
- 664 César-Razquin A, Snijder B, Frappier-Brinton T, Isserlin R, Gyimesi G, Bai X, Reithmeier RA,  
665 Hepworth D, Hediger MA, Edwards AM, Superti-Furga G. A call for systematic research on solute  
666 carriers. *Cell* 2015;162(3):478-487. doi:10.1016/j.cell.2015.07.022.
- 667 Chang ACM, Cha J, Koentgen F, Reddel RR. The murine stanniocalcin 1 gene is not essential for  
668 growth and development. *Molecular and Cellular Biology* 2005;25(3):10604-10610.  
669 doi: 10.1128/MCB.25.23.10604-10610.2005.
- 670 Christenson LK, Strauss JF III. Steroidogenic acute regulatory protein: an update on its regulation and  
671 mechanism of action. *Archives of Medical Research* 2001;32(6):576-586.  
672 [http://dx.doi.org/10.1016/S0188-4409\(01\)00338-1](http://dx.doi.org/10.1016/S0188-4409(01)00338-1)
- 673 Christian DP. Comparative demography of three Namib desert rodents: Responses to the provision of  
674 supplementary water. *Journal of Mammalogy* 1979;60(4):679-690. <https://doi.org/10.2307/1380185>
- 675 Collet JM, Dean RF, Worley K, Richardson DS, Pizzari T. The measure and significance of Bateman's  
676 principles. *Proceedings of the Royal Society B-Biological Sciences* 2014;281(1782).  
677 doi: 10.1098/rspb.2013.2973
- 678 Dantzer WH. Renal Adaptations of Desert Vertebrates. *BioScience* 1982;32(2):108-113.  
679 doi: 10.2307/1308563

- 680 Dewey GC, Elias H, Appel KR. Stereology of renal corpuscles of desert and swamp deermice. *Nephron*  
681 1966;3(6): 352-365. doi: 10.1159/000179552.
- 682 Diaz GB, Ojeda RA, Rezende EL. Renal morphology, phylogenetic history and desert adaptation of  
683 South American hystricognath rodents. *Functional Ecology* 2006;20: 609–620.  
684 doi: 10.1111/j.1365-2435.2006.01144.x
- 685 Doherty GJ, McMahon HT. Mechanisms of Endocytosis. *Annual Review of Biochemistry* 2009;78:  
686 857-902. Doi: 10.1146/annurev.biochem.78.081307.110540
- 687 El-Bakry HA, Zahran WM, Bartness TJ. Control of reproductive and energetic status by environmental  
688 cues in a desert rodent, Shaw's jird. *Physiology and Behavior* 1999;66(4): 657-666.  
689 [http://doi.org/10.1016/S0031-9384\(98\)00344-8](http://doi.org/10.1016/S0031-9384(98)00344-8)
- 690 Evans MEK, Hearn DJ, Theiss KE, Cranston K, Holsinger KE, Donoghue MJ. Extreme environments  
691 select for reproductive assurance: evidence from evening primroses (*Oenothera*). *New Phytologist*  
692 2010;191:555-563. doi: 10.1111/j.1469-8137.2011.03697.x.
- 693 Friedman J. 20 Years of leptin: leptin at 20: an overview. *Journal of Endocrinology* 2014;223:1T1-T8.  
694 doi: 10.1530/JOE-14-0405.
- 695 Froussios K, Schurch NJ, Mackinnon K, Gierlinski M, Duc C, Simpson GG, Barton GJ. How well do  
696 RNA-Seq differential gene expression tools perform in higher eukaryotes? *bioRxiv*, 2016. doi:  
697 10.1101/090753.
- 698 Fu L, Niu B, Zhu Z, Wu S, Li W. CD-HIT: accelerated for clustering the next generation sequencing  
699 data. *Bioinformatics* 2012;28(23): 3150-3152. Doi: 10.1093/bioinformatics/bts565



- 700 Fuller A, Hetem RS, Maloney SK, Mitchell D. Adaptation to Heat and Water Shortage in Large, Arid-Zone  
701 Mammals. *Physiology* 2014;29(3): 159-167. doi: 10.1152/physiol.00049.2013
- 702 Geiser F. In Navas A, Carvalho C, Eduardo J, editors. *Aestivation: Molecular and Physiological Aspects*  
703 (Volume 49 in the series *Progress in Molecular and Subcellular Biology*). Berlin, Springer; 2010. p. 95-  
704 111. doi:10.1007/978-3-642-02421-4\_5
- 705 Gierliński M, Cole C, Schofield P, Schurch NJ, Sherstnev A, Singh V, Wrobel N, Gharbi K, Simpson G,  
706 OwenHughes T, Blaxter M, Barton GJ. Statistical models for RNA-seq data derived from a two-  
707 condition 48-replicate experiment. *Bioinformatics* 2015;31(22): 3625-3630.  
708 doi: 10.1093/bioinformatics/btv425.
- 709 Gkouvatsos K, Papanikolaou G, Pantopoulos K. Regulation of iron transport and the role of transferrin.  
710 *Biochimica Biophysica Acta (BBA) – General Subjects* 2012;1820(3): 188-202.  
711 doi:10.1016/j.bbagen.2011.10.013
- 712 Hediger MA, Romero MF, Peng J-B, Rolfs A, Takanaga H, Bruford EA. The ABCs of solute carriers:  
713 physiological, pathological and therapeutic implications of human membrane transport proteins:  
714 introduction. *Pflügers Archiv: European Journal of Physiology* 2004;447(5):465-548.  
715 doi:10.1007/s00424-003-1192-y.
- 716 Hediger MA, Clemençon B, Burrier RE, Bruford EA. The ABCs of membrane transporters in health and  
717 disease (Slc series): introduction. *Molecular Aspects of Medicine* 2013;34(2-3):95-107.  
718 doi: 10.1016/j.mam.2012.12.009.
- 719 Henry O, Dubost G. Breeding periods of *Gerbillus cheesmani* (Rodentia, Muridae) in Saudi Arabia.  
720 *Mammalia* 2012;76(4):383-387. doi: 10.1515/mammalia-2012-0017.
- 721 Hill RW, Veghte JH. Jackrabbit ears: surface temperatures and vascular responses. *Science* 1976;  
722 194(4263):436-8. doi: 10.1126/science.982027

723 Hoekstra HE, Hirschmann RJ, Bunday RA, Insel PA, Crossland JP. A single amino acid mutation  
724 contributes to adaptive beach mouse color patterns. *Science* 2006;313:101–104.  
725 doi: 10.1126/science.1126121.

726 Hohenlohe PA, Bassham S, Etter PD, Stiffler N, Johnson EA, Cresko WA. Population genomics of  
727 parallel adaptation in threespine stickleback using sequenced RAD Tags. *PLoS Genetics* 2010;  
728 6(2):e1000862. doi: 10.1371/journal.pgen.1000862.

729 Hutson JM, Li R, Southwell BR, Newgreen D, Cousinery M. Regulation of testicular descent. *Pediatric*  
730 *Surgery International* 2015;31(4):317-325. doi: 10.1007/s00383-015-3673-4

731 Jiang H, Lei R, Ding S-W, Zhu S. Skewer: a fast and accurate adapter trimmer for next-generation  
732 sequencing paired-end reads. *BMC Bioinformatics* 2014;15:182. doi: 10.1186/1471-2015-15-182

733 Jones AG, Arguello JR, Arnold SJ. Validation of Bateman’s principles: A genetic study of sexual  
734 selection and mating patterns in the rough-skinned newt. *Proceedings of the Royal Society B-Biological*  
735 *Sciences* 2002;269(1509):2533-2539. doi: 10.1098/rspb.2002.2177.

736 Jones AG, Rosenqvist G, Berglund A, Avise JC. The measurement of sexual selection using Bateman’s  
737 principles: an experimental test in the sex-role reversed pipefish *Syngnathus typhle*. *Integrative and*  
738 *Comparative Biology* 2005;45(5):874-884. doi: 10.1093/icb/45.5.874

739 Jones FC, Grabherr MG, Chan YF, Russell P, Mauceli E, Johnson J, Swofford R, Pirun M, Zody MC,  
740 White S, Birney E, Searle S, Schmutz J, Grimwood J, Dickson MC, Myers RM, Miller CT, Summers  
741 BR, Knecht AK, Brady SD, Zhang H, Pollen AA, Howes T, Amemiya C, Broad Institute Genome  
742 Sequencing Platform & Whole Assembly Team, Lander ES, Di Palma F, Lindblad-Toh K, Kingsley  
743 DM. The genomic basis of adaptive evolution in threespine sticklebacks. *Nature* 2012;484:55–61.  
744 doi: 10.1038/nature10944.

- 745 Jones JI, Clemmons DR. Insuline-like growth factors and their biding proteins: biological actions.  
746 Endocrine Reviews 2008;16(1). doi: 10.1210/edrv-16-1-3
- 747 Kalabukhov NI. Comparative ecology of hibernating animals. Bulletin of the Museum of Comparative  
748 Zoology at Harvard 1960;124: 45-74. Doi: N/A
- 749 Kawamura K, Kumagai J, Sudo S, Chun S-Y, Pisarska M, Morita H, Toppari J, Fu P, Wade JD,  
750 Bathgate RAD, Hsueh AJW. Paracrine regulation of mammalian oocyte maturation and male germ cell  
751 survival. Proceedings of the National Academy of Sciences 2004;101(19): 7323-7328.  
752 doi: 10.1073.pnas.0307061101.
- 753 Kelt DA. Comparative ecology of desert small mammals: a selective review of the past 30 years. Journal  
754 of Mammalogy 2011;92(6):1158–1178. doi: <http://dx.doi.org/10.1644/10-MAMM-S-238.1>
- 755 King, JA, (editor). Biology of *Peromyscus* (Rodentia). Special Publication No. 2, The American Society  
756 of Mammologists, 1968. doi: 10.2307/1378817
- 757 Knight J. Sexual Stereotypes. Nature 2002;415:254-256. doi:10.1038/415254a
- 758 Kordonowy LK, MacManes MD. Characterization of a male reproductive transcriptome for *Peromyscus*  
759 *eremicus* (cactus mouse). PeerJ 2016;4:e2617. doi: 10.7717/peerj.2617.
- 760 Kordonowy L, Lombardo K, Green H, Dawson, MD, Bolton E, LaCourse S, MacManes M.  
761 Physiological and biochemical changes associated with experimental dehydration in the desert adapted cactus  
762 mouse, *Peromyscus eremicus*. Physiological Reports 2017;5(e13218). doi: 10.14814/phy2.13218  
763
- 764 Kovac JR, Lipshultz. The significance of insulin-like factor 3 as a marker of intratesticular testosterone.  
765 Fertility and Sterility 2013;99(1):66-67. doi: 10.1016/j.fertnstert.2012.09.009.

- 766 Kwon T-H, Frokiaer J, Nielsen S. Regulation of aquaporin-2 in the kidney: A molecular mechanism of  
767 body-water homeostasis. *Kidney Research Clinical Practice* 2013;32(3):96-1023.  
768 doi: 10.1016/j.krcp.2013.07.005.
- 769 Leijonhufvud P, Akerlof E, Pousette A. Structure of sperm activating protein. *Molecular Human*  
770 *Reproduction* 1997;3(3):249-253. doi:10.1093/molehr/3.3.249.
- 771 Le Roith D. Insulin-like growth factors. *The New England Journal of Medicine* 1997;336(9):633-640.  
772 doi: 10.1056/NEJM199702273360907
- 773 Li W, Godzik A. Cd-hit: a fast program for clustering and comparing large sets of protein or nucleotide  
774 sequences. *Bioinformatics* 2006;22(13):1658-1659. doi: 10.1093/bioinformatics/btl158.
- 775 Liu J, Li G, Chang Z, Yu T, Liu B McMullen R, Chen P, Huang X. BinPacker: packing-based *de novo*  
776 transcriptome assembly from RNA-seq data. *PLoS Computational Biology* 2016;12(2):e1004772.  
777 doi:10.1371/journal.pcbi.1004772.
- 778 Lorenzo FR, Huff C, Myllymäki M, Olenchock B, Swierczek S, Tashi T, Gordeuk V, Wuren T, Ri-Li G,  
779 McClain DA, Khan TM, Koul PA, Guchhait P, Salama ME, Xing J, Semenza GL, Liberzon E, Wilson  
780 A, Simonson TS, Jorde LB, Kaelin Jr WG, Koivunen P, Prchal JT. A genetic mechanism for Tibetan  
781 high-altitude adaptation. *Nature Genetics* 2014;46(9):951–956. doi: 10.1038/ng.3067.
- 782 Love MI, Huber W, and Anders S. Moderated estimation of fold change and dispersion for RNA-seq  
783 data with DESeq2. *Genome Biology* 2014;15:550. doi: 10.1186/s13059-014-0550-8.
- 784 MacManes MD. On the optimal trimming of high-throughput mRNA sequence data. *Frontiers in Genetics*  
785 2014;5:13. doi.org/10.3389/fgene.2014.00013.
- 786 MacManes MD. Establishing evidenced-based best practice for the *de novo* assembly and evaluation of  
787 transcriptomes from non-model organisms. *bioRxiv*. 2016. doi: 10.1101/035642.

- 788 MacManes MD, Eisen MB. Characterization of the transcriptome, nucleotide sequence polymorphism,  
789 and natural selection in the desert adapted mouse *Peromyscus eremicus*. PeerJ 2014;2:e642.  
790 doi.org/10.7717/peerj.642.
- 791 MacManes MD. Severe acute dehydration in a desert rodent elicits a transcriptional response that  
792 effectively prevents kidney injury. American Journal of Physiology-Renal Physiology *in press* (April 5,  
793 2017). doi: 10.1152/ajprenal.00067.2017
- 794 MacMillen RE, Garland T Jr. In Kirkland LG Jr, Layne JN, editors. Advances in the Study of  
795 *Peromyscus* (Rodentia). Lubbock: Texas Tech University Press; 1989. p. 143-168.
- 796 MacMillen RE, Hinds DS. Water regulatory efficiency in heteromyid rodents: A model and its  
797 application. Ecology 1983;64(1):152-164. doi: 10.2307/1937337
- 798 Madden T. 2002 Oct 9 [Updated 2003 Aug 13]. The BLAST Sequence Analysis Tool. In: McEntyre J,  
799 Ostell J, editors. The NCBI Handbook [Internet]. Bethesda (MD): National Center for Biotechnology  
800 Information (US); 2002-. Chapter 16. Available from: <http://www.ncbi.nlm.nih.gov/books/NBK21097/>
- 801 Marra NJ, Eo SH, Hale MC, Waser PM, DeWoody JA. *A priori* and *a posteriori* approaches for finding  
802 genes of evolutionary interest in non-model species: Osmoregulatory genes in the kidney transcriptome  
803 of the desert rodent *Dipodomys spectabilis* (banner-tailed kangaroo rat). Comparative Biochemistry and  
804 Physiology, Part D: Genomics Proteomics 2012;7(4):328-339. doi: 10.1016/j.cbd.2012.07.001.
- 805 Marra NJ, Romero A, DeWoody A. Natural selection and the genetic basis of osmoregulation in  
806 heteromyid rodents as revealed by RNA-seq. Molecular Ecology 2014;23(11):2699-2711.  
807 doi: 10.1111/mec.12764.

- 808 Martin K, Wiebe KL. Coping mechanisms of alpine and arctic breeding birds: extreme weather and  
809 limitations to reproductive resilience. *Integrative and Comparative Biology* 2004;44(2):177-185.  
810 doi: 10.1093/icb/44.2.177.
- 811 McCarthy DJ, Chen Y, Smyth GK. Differential expression analysis of multifactor RNA-Seq  
812 experiments with respect to biological variation. *Nucleic Acids Research* 2012;40(10):4288-4297.  
813 doi: 10.1093/nar/gks042
- 814 Moniri NH. Free-fatty acid receptor-4 (GPR120): Cellular and molecular function and its role in  
815 metabolic disorders. *Biochemical Pharmacology* 2016;110-111:1-15. doi:10.1016/j.bcp.2016.01.021
- 816 Moussad EE-DA, Brigstock DR. Connective Tissue Growth Factor: What's in a Name? *Molecular*  
817 *Genetics and Metabolism* 2000;71: 276-292. doi: 10.1006/mgme.2000.3059.
- 818 Munshi-South J, Richardson JL. *Peromyscus* transcriptomics: understanding adaptation and gene  
819 expression plasticity within and between species of deer mice. *Seminars in Cell & Developmental*  
820 *Biology in press* 2016. doi: 10.1016/j.semcdb.2016.08.011
- 821 Nargund VH. Effects of psychological stress on male fertility. *Nature Reviews Urology* 2015;12:373-  
822 382. doi: 10.1038/nrurol.2015.112
- 823 Oh J, Woo JM, Choi E, Kim T, Cho BN, Park ZY, Kim YC, Kim DH, Cho C. Molecular, biochemical,  
824 and cellular characterization of epididymal ADAMs, Adam7 and ADAM28. *Biochemical and*  
825 *Biophysical Research Communications* 2005;331(4):1374-1383. doi:10.1016/j.bbrc.2005.04.067
- 826 Pan D. The hippo signaling pathway in development and cancer. *Developmental Cell* 2010;19(4):491-  
827 505. doi: 10.1016/j.devcel.2010.09.011.

- 828 Pathirana IN, Kawte N, Bullesbach EE, Takahashi M, Hatoya S, Inaba T, Tamada H. Insulin-like  
829 peptide 3 stimulates testosterone secretion in mouse Leydig cells via cAMP pathway. *Regulatory*  
830 *Peptides* 2012;178(1-3):102-106. <http://doi.org.libproxy.unh.edu/10.1016/j.regpep.2012.07.003>
- 831 Patro R, Duggal G, Kingsford C. Salmon: Accurate, Versatile and Ultrafast Quantification from RNA-  
832 seq Data using Lightweight-Alignment. *bioRxiv* 021592; 2015. doi: <http://dx.doi.org/10.1101/021592>.
- 833 Pitia AM, Uchiyama K, Sano Hiroaki, Kinukawa M, Minato Y Sasada H Kohsaka T. Functional  
834 insulin-like factor 3 (Insl3) hormone-receptor system in the testes and spermatozoa of domestic  
835 ruminants and its potential as a predictor of sire fertility. *Animal Science Journal* 2017;88(4):678-690.  
836 doi: 10.1111/asj.12694
- 837 R Core Team. R: A Language and Environment for Statistical Computing. R Foundation for Statistical  
838 Computing. Vienna, Austria. 2016. <https://www.R-project.org>
- 839 Robinson MD, McCarthy DJ, Smyth GK. edgeR: a Bioconductor package for differential expression  
840 analysis of digital gene expression data. *Bioinformatics* 2010;26(1):139-140.  
841 doi: 10.1093/bioinformatics.btp616.
- 842 Sarli J, Lutermann H, Alagali AN, Mohammed OB, Bennett NC. Reproductive patterns in the  
843 Baluchistan gerbil, *Gerbillus nanus* (Rodentia: Muridae), from western Saudi Arabia: The role of  
844 rainfall and temperature. *Journal of Arid Environments* 2015;113:87-94.  
845 <http://dx.doi.org/10.1016/j.jaridenv.2014.09.007>
- 846 Sarli J, Lutermann H, Alagali AN, Mohammed OB, Bennett NC. Seasonal reproduction in the Arabian  
847 spiny mouse, *Acomys dimidiatus* (Rodentia: Muridae) from Saudi Arabia: The role of rainfall and

- 848 temperature. *Journal of Arid Environments* 2016;124: 352-359.
- 849 <http://dx.doi.org/10.1016/j.jaridenv.2015.09.008>
- 850 Schiöth HB, Roshanbin S, Hägglund MG, Fredriksson R. Evolutionary origin of amino acid transporter  
851 families Slc32, Slc36 and Slc38 and physiological, pathological and therapeutic aspects. *Molecular*  
852 *Aspects of Medicine* 2013;34(2-3):571-585. doi:10.1016/j.mam.2012.07.012
- 853 Schmidt-Nielsen K. In Schmidt-Nielsen K, editor. *Desert Animals: Physiological Problems of Heat and*  
854 *Water*. New York: Oxford University Press; 1964. p.129-138.
- 855 Schmidt-Nielsen B, Schmidt-Nielsen K, Brokaw A, Schneiderman H. Water conservation in desert  
856 rodents. *Journal of Cellular Physiology* 1948;32(3):331-360. doi: 10.1002/jcp.1030320306.
- 857 Schmidt-Nielsen K, Schmidt-Nielsen B. Water metabolism of desert mammals 1. *Physiological Reviews*  
858 1952;32(2):135-166. PMID: 1492697.
- 859 Schurch NJ, Schofield P, Gierliński M, Cole C, Sherstnev A, Singh V, Wrobel N, Gharbi K, Simpson  
860 GG, Owen-Hughes T, Blaxter M, Barton GJ. How many biological replicates are needed in an RNA-seq  
861 experiment and which differential expression tool should you use? *RNA* 2016;22(6):839-851.  
862 doi: 10.1261/rna.053959.115
- 863 Schwimmer H, Haim A. Physiological adaptations of small mammals to desert ecosystems. *Integrative*  
864 *Zoology* 2009;4:357-366. doi: 10.1111/j.1749-4877.2009.00176.x
- 865 Scott C. dammit: an open and accessible de novo transcriptome annotator. 2016.  
866 [www.camillescott.org/dammit](http://www.camillescott.org/dammit)
- 867 Shanas U, Haim A. Diet salinity and vasopressin as reproductive modulators in the desert-dwelling  
868 golden spiny mouse (*Acomys russatus*). *Physiology and Behavior* 2004;81(4):645-650.  
869 doi: 10.1016/j.physbeh.2004.03.002



- 870 Sikes RS, Animal Care and Use Committee of the American Society of Mammalogists. 2016 Guidelines  
871 of the American society of Mammalogists for the use of wild mammals in research and  
872 education. *Journal of Mammalogy* 2016;97(3):663-688. doi: 10.1093/jmammal/gyw078
- 873 Simão FA, Waterhouse RM, Ioannidis P, Kriventseva EV, Zdobnov EM. BUSCO: assessing genome  
874 assembly and annotation completeness with single-copy orthologs. *Bioinformatics* 2015;31(19):3210-  
875 3212. doi: 10.1093/bioinformatics/btv351.
- 876 Smith-Unna R, Bournnell C, Patro R, Hibberd JM, Kelley S. TransRate: reference free quality  
877 assessment of de-novo transcriptome assemblies. *Genome Research* 2016;26:1134-1144.  
878 doi: 10.1101/gr.196469.115
- 879 Snel B, Lehmann G, Bork P, Huynen MA. STRING: a web-server to retrieve and display the repeatedly  
880 occurring neighbourhood of a gene. *Nucleic Acids Research* 2000;28(18):3442-3444.  
881 doi: 10.1093/nar/28.18.3442.
- 882 Somero GN. The physiology of climate change: how potentials for acclimatization and genetic  
883 adaptation will determine ‘winners’ and losers’. *Journal of Experimental Biology* 2010;213:912-920.  
884 doi: 10/1242/jeb037473.
- 885 Soneson C, Love MI, Robinson MD. Differential analyses for RNA-seq: transcript-level estimates  
886 improve gene-level inferences. *F1000Research* 2016;4:1521. doi: 10.12688/f1000research.7563.2
- 887 Song L, Florea L. Rcorrector: efficient and accurate error correction for Illumina RNA-seq reads.  
888 *Gigascience* 2015;4:48. doi: 10.1186/s13742-015-0089-y.

- 889 Stenmark H, Olkkonen VM. The Rab GTPase family. *Genome Biology* 2001;2(5). doi: 10.1186/gb-  
890 2001-2-5-reviews3007
- 891 Stevens RD, Tello JS. Micro- and macrohabitat associations in Mojave desert rodent communities.  
892 *Journal of Mammalogy* 2009;90(2):388-403. doi: 10.1644/08-MAMM-A-141.1
- 893 Storz JF, Runck AM, Moriyama H, Weber RE, Fago A. Genetic differences in hemoglobin function  
894 between highland and lowland deer mice. *Journal of Experimental Biology* 2010;213(15):2565–2574  
895 doi: 10.1242/jeb.042598.
- 896 Szklarczyk D, Franceschini A, Wyder S, Forslund K, Heller D, Huerta-Cepas J, Simonovic M, Roth A,  
897 Santos A, Tsafou KP, Kuhn M, Bork P, Jensen LJ, von Mering C. STRING v10: protein-protein  
898 interaction networks, integrated over the tree of life. *Nucleic Acids Research* 2015;43: D447-452. doi:  
899 10.1093/nar/gku1003.
- 900 Tahri-Joutei A, Pointis G. Modulation of mouse Leydig cell steroidogenesis through a specific arginine-  
901 vasopressin receptor. *Life Sciences* 1988a;43(2):177-185. doi: 10.1016/0024-3205(88)90295-0
- 902 Tahri-Joutei A, Pointis G. Time-related effects of arginine vasopressin on steroidogenesis in cultured  
903 mouse Leydig cells. *The Journal for the Society of Reproduction and Fertility* 1988b;82:247-254.  
904 doi: 10.1530/jrf.0.0820247
- 905 Trivers R. L. Parental Investment and Sexual Selection. In: Campbell B, editor. *Sexual Selection and the*  
906 *Descent of Man*. Chicago: Aldine; 1972. p. 136-177.
- 907 Urity VB, Issaian T, Braun EJ, Dantzer WH, Pannabecker TL. Architecture of kangaroo rat inner  
908 medulla: segmentation of descending thin limb of Henle's loop. *American Journal of Physiology-*

- 909 Regulatory Integrative and Comparative Physiology 2012;302(6):R720-R726.  
910 doi:10.1152/ajpregu.00549.2011.
- 911 Veal R, Caire W. *Peromyscus eremicus*. Mammalian Species 1979;118:1-6.  
912 <http://www.science.smith.edu/msi/pdf/i0076-3519-118-01-0001.pdf>.
- 913 Vimtrup BJ, Schmidt-Nielsen B. The histology of the kidney of kangaroo rats. The Anatomical Record  
914 1952;114(4):515-528. doi:10.1002/ar.1091140402.
- 915 Vitavska O, Wiczorek H. The Slc45 gene family of putative sugar transporters. Molecular Aspects of  
916 Medicine 2013;34(2-3):655-660. doi:10.1016/j.mam.2012.05.014
- 917 Vorhies CT. Water Requirements of Desert Animals in the Southwest. (College of Agriculture,  
918 University of Arizona, Tucson, Agricultural Experiment Station.) Technical Bulletin No. 107 1945:487-  
919 525. <http://hdl.handle.net/10150/190625>
- 920 Wagner GF, Dimattia GE. The stanniocalcin family of proteins. Journal of Experimental Zoology Part A  
921 2006;305A(9): 769-780. doi: 10.1002/jez.a.313
- 922 Walsberg GE. Small mammals in hot deserts: some generalizations revisited. BioScience 2000;50(2):  
923 109-120. doi: 10.1641/0006-3568(2000)050[0109:SMIHDS]2.3.C
- 924 Wingfield JC. The ecology of stress: ecological processes and the ecology of stress: the impacts of  
925 abiotic environmental factors. Functional Ecology 2013;27:37-44. doi: 10/1111/1365-2435.12039
- 926 Wingfield JC, Kelley JP, Angelier F. What are extreme environmental conditions and how do organisms  
927 cope with them? Current Zoologist 2011;57(3):373-374. doi: 10/1093/czoolo/57.3.363
- 928 Wingfield JC, Sapolsky RM. Reproduction and resistance to stress: when and how. Journal of  
929 Neuroendocrinology 2003;15:711-724. doi/10.1046/j.1365-2826.2003.01033.x

- 930 Wube T, Fares F, Haim A. A differential response in the reproductive system and energy balance of  
931 spiny mice *Acomys* populations to vasopressin treatment. *Comparative Biochemistry and Physiology.*  
932 Part A, *Molecular and Integrative Physiology* 2008;151:499-504. doi: 10.1016/j.cbpa.2008.06.027
- 933 Xiao X, Mruk DD, Cheng CY. Intercellular adhesion molecules (ICAMs) and spermatogenesis. *Human*  
934 *Reproduction Update* 2013;19(2):167-186. doi:10.1093/humupd/dms049.
- 935 Yahr P, Kessler S. Suppression of reproduction in water-deprived Mongolian gerbils (*Meriones*  
936 *unguiculatus*). *Biology of Reproduction* 1975;12(2):249-254.  
937 <https://doi.org/10.1095/biolreprod12.2.249>

938 Table 1: Transcriptome assembly (BinPacker CD-hit-est Transrate Corrected) performance metrics for:  
 939 contig number, TransRate score (Score), BUSCO indices: % single copy orthologs (% SCO), %  
 940 duplicated copy orthologs (% DCO), % fragmented (% frag), and % missing (% miss), as well as  
 941 Salmon mapping rates (% mapping) for the optimized testes assembly. Dammit transcriptome assembly  
 942 annotation statistics, including searches in the program TransDecoder for open reading frames (ORFs)  
 943 and searches for homologous sequences in five databases: Rfam, Pfam-A, Uniref90, OrthoDB, and  
 944 BUSCO. Percentages were calculated from the count number of each parameter divided by the total  
 945 number of contigs in the transcriptome (155,134). The only exception to this calculation is for complete  
 946 ORFs, which were calculated as a percentage of the total ORFs (75,482). The BUSCO results for the  
 947 annotated assembly are not shown here as they are identical to those for the un-annotated assembly.  
 948

| <i>Transcriptome Assembly Statistics</i> |                     |               |              |                 |                 |                  |                         |
|------------------------------------------|---------------------|---------------|--------------|-----------------|-----------------|------------------|-------------------------|
| <b>Contig #</b>                          | <b>Score</b>        | <b>% SCO</b>  | <b>% DCO</b> | <b>% frag</b>   | <b>% miss</b>   | <b>% mapping</b> |                         |
| 155,134                                  | 0.335               | 77            | 27           | 5.9             | 16              | 92.14            |                         |
| <i>Dammit Annotation Statistics</i>      |                     |               |              |                 |                 |                  |                         |
| <b>Search Type</b>                       | <i>TransDecoder</i> |               | <i>Rfam</i>  | <i>Pfam-A</i>   | <i>Uniref90</i> | <i>OrthoDB</i>   | <i>Dammit</i>           |
| <b>Parameter</b>                         | Total ORFs          | Complete ORFs | ncRNAs       | Protein Domains | Proteins        | Orthologs        | Total Annotated Contigs |
| <b>Count</b>                             | 75,482              | 43,028        | 937          | 25,675          | 62,865          | 51,806           | 77,915                  |
| <b>Percentage</b>                        | 48.7%               | 57.0 %        | 0.6 %        | 16.6 %          | 40.5 %          | 33.4 %           | 50.2 %                  |

949

950

951 Table 2: EdgeR determined significantly differentially expressed genes by treatment group in *P.*  
952 *eremicus* testes. Of the 15 DGE, seven were significantly more highly expressed in WET mice (High in  
953 WET) and eight were more highly expressed in DRY mice (High in DRY).  
954

| <b>Ensembl ID</b>     | <b>log<sub>2</sub>FC</b> | <b>logCPM</b> | <b>FDR</b> | <b>Gene ID</b> | <b>HIGH</b> |
|-----------------------|--------------------------|---------------|------------|----------------|-------------|
| ENSMUSG00000079019.2  | -4.354                   | 1.650         | 5.82E-09   | Insl3          | WET         |
| ENSMUSG00000054200.6  | -3.734                   | 0.619         | 1.82E-06   | Ffar4          | WET         |
| ENSMUSG00000026435.15 | -2.448                   | 2.447         | 1.13E-03   | Slc45a3        | WET         |
| ENSMUSG00000025020.11 | -2.231                   | 1.770         | 1.13E-03   | Slit1          | WET         |
| ENSMUSG00000031170.14 | -2.421                   | 2.578         | 1.13E-03   | Slc38a5        | WET         |
| ENSMUSG00000030830.18 | -2.180                   | 1.666         | 3.37E-02   | Itgal          | WET         |
| ENSMUSG00000032554.15 | -2.066                   | 3.287         | 4.85E-02   | Trf            | WET         |
| ENSMUSG00000001768.15 | 3.086                    | 1.006         | 1.46E-07   | Rin2           | DRY         |
| ENSMUSG00000025479.9  | 2.971                    | 3.001         | 7.97E-05   | Cyp2e1         | DRY         |
| ENSMUSG00000020427.11 | 2.681                    | 3.887         | 1.13E-03   | Igfbp3         | DRY         |
| ENSMUSG00000019997.11 | 2.314                    | 3.235         | 1.13E-03   | Ctgf           | DRY         |
| ENSMUSG00000040170.13 | 1.951                    | 0.753         | 1.72E-03   | Fmo2           | DRY         |
| ENSMUSG00000023915.4  | 1.534                    | 1.290         | 2.02E-02   | Tnfrsf21       | DRY         |
| ENSMUSG00000052974.8  | 2.077                    | 0.647         | 2.26E-02   | Cyp2f2         | DRY         |
| ENSMUSG00000027901.12 | 2.492                    | -0.620        | 4.78E-02   | Dennd2d        | DRY         |

955

956 Table 3: EdgeR determined significantly differentially expressed transcripts by treatment group in *P.*  
 957 *eremicus* testes. Of the 66 total DTE, 45 were significantly more highly expressed in WET mice (High  
 958 in WET) and 21 were more highly expressed in DRY mice (High in DRY). BLASTn matches to  
 959 Ensembl IDs and corresponding Gene IDs.  
 960

| <b>HIGH: WET</b>     |                          |               |            |                       |             |
|----------------------|--------------------------|---------------|------------|-----------------------|-------------|
| <b>Transcript ID</b> | <b>log<sub>2</sub>FC</b> | <b>logCPM</b> | <b>FDR</b> | <b>Ensembl ID</b>     | <b>Gene</b> |
| BINPACKER.15365.1    | -3.703                   | 0.047         | 5.31E-11   | ENSMUSG00000054200.6  | Ffar4       |
| BINPACKER.2960.1     | -4.268                   | 1.147         | 2.06E-09   | ENSMUSG00000079019.2  | Ins13       |
| BINPACKER.17981.2    | -2.975                   | 0.436         | 6.29E-08   | ENSMUSG00000026435.15 | Slc45a3     |
| BINPACKER.9961.2     | -2.426                   | 1.998         | 7.50E-07   | ENSMUSG00000031170.14 | Slc38a5     |
| BINPACKER.3452.1     | -2.507                   | -0.140        | 3.56E-06   | no match              | -           |
| BINPACKER.724.4      | -2.162                   | 2.667         | 8.32E-06   | ENSMUSG00000032554.15 | Trf         |
| BINPACKER.9604.1     | -2.582                   | 0.547         | 7.87E-05   | no match              | -           |
| BINPACKER.31087.1    | -2.908                   | -0.858        | 9.74E-05   | no match              | -           |
| BINPACKER.24398.1    | -2.440                   | -0.689        | 9.74E-05   | ENSMUSG00000036596.6  | Cpz         |
| BINPACKER.9726.1     | -3.474                   | -0.107        | 2.38E-04   | ENSMUSG00000026435.15 | Slc45a3     |
| BINPACKER.9218.3     | -1.578                   | 1.525         | 2.76E-04   | ENSMUSG00000021253.6  | Tgfb3       |
| BINPACKER.18534.1    | -2.332                   | 1.346         | 4.85E-04   | ENSMUSG00000025020.11 | Slit1       |
| BINPACKER.17022.3    | -2.899                   | -0.561        | 1.00E-03   | no match              | -           |
| BINPACKER.13806.1    | -2.442                   | -0.381        | 1.13E-03   | ENSMUSG00000025172.2  | Ankrd2      |
| BINPACKER.7740.1     | -2.790                   | 1.095         | 1.13E-03   | ENSMUSG00000057074.6  | Ces1g       |
| BINPACKER.10034.2    | -4.420                   | 0.387         | 1.23E-03   | ENSMUSG00000026516.8  | Nvl         |
| BINPACKER.11560.2    | -1.465                   | 2.050         | 1.66E-03   | ENSMUSG00000021913.7  | Ogdhl       |
| BINPACKER.13701.1    | -1.312                   | 1.804         | 2.28E-03   | ENSMUSG00000025648.17 | Pfkfb4      |
| BINPACKER.3510.3     | -2.163                   | 0.906         | 2.95E-03   | ENSMUSG00000027822.16 | Slc33a1     |
| BINPACKER.15806.1    | -1.700                   | 1.062         | 3.39E-03   | ENSMUSG00000015702.13 | Anxa9       |
| BINPACKER.17992.1    | -2.542                   | 0.653         | 3.39E-03   | ENSMUSG00000030830.18 | Itgal       |
| BINPACKER.9726.2     | -2.119                   | 0.560         | 3.48E-03   | ENSMUSG00000026435.15 | Slc45a3     |

|                      |                          |               |            |                       |             |
|----------------------|--------------------------|---------------|------------|-----------------------|-------------|
| BINPACKER.6383.3     | -2.093                   | 1.270         | 4.16E-03   | ENSMUSG00000002109.14 | Ddb2        |
| BINPACKER.20716.2    | -4.204                   | -0.566        | 5.75E-03   | ENSMUSG00000013846.9  | St3gal1     |
| BINPACKER.20114.1    | -1.661                   | 0.501         | 5.97E-03   | ENSMUSG00000030972.6  | Acsm5       |
| BINPACKER.18622.1    | -1.645                   | 1.704         | 6.36E-03   | no match              | -           |
| BINPACKER.24914.1    | -2.211                   | -0.159        | 9.83E-03   | ENSMUSG00000003555.7  | Cyp17a1     |
| BINPACKER.31815.1    | -1.905                   | -0.770        | 9.83E-03   | no match              | -           |
| BINPACKER.6740.3     | -3.090                   | -0.434        | 1.04E-02   | no match              | -           |
| BINPACKER.20530.1    | -1.626                   | 0.545         | 1.12E-02   | ENSMUSG00000038463.8  | Olfml2b     |
| BINPACKER.20656.1    | -1.910                   | -0.531        | 1.22E-02   | ENSMUSG00000029373.7  | Pf4         |
| BINPACKER.4855.1     | -1.340                   | 4.025         | 1.23E-02   | ENSMUSG00000059991.7  | Nptx2       |
| BINPACKER.1846.1     | -3.280                   | -0.792        | 1.23E-02   | no match              | -           |
| BINPACKER.6494.2     | -3.363                   | 0.029         | 1.26E-02   | ENSMUSG00000052861.13 | Dnah6       |
| BINPACKER.1818.1     | -1.713                   | 3.289         | 2.03E-02   | ENSMUSG00000024125.1  | Sbpl        |
| BINPACKER.10743.2    | -1.915                   | -0.525        | 2.06E-02   | ENSMUSG00000041607.16 | Mbp         |
| BINPACKER.13054.2    | -1.147                   | 2.697         | 2.06E-02   | ENSMUSG00000022994.8  | Adcy6       |
| BINPACKER.6807.1     | -1.330                   | 2.106         | 2.13E-02   | ENSMUSG00000046687.5  | Gm5424      |
| BINPACKER.14160.1    | -2.051                   | 0.603         | 2.86E-02   | ENSMUSG00000041556.8  | Fbxo2       |
| BINPACKER.16191.1    | -1.431                   | 0.926         | 3.42E-02   | ENSMUSG00000028654.13 | Mycl        |
| BINPACKER.10141.3    | -3.283                   | -1.191        | 3.68E-02   | ENSMUSG00000024132.5  | Eci1        |
| BINPACKER.23790.1    | -1.756                   | -0.275        | 4.51E-02   | ENSMUSG00000001119.7  | Col6a1      |
| BINPACKER.22521.1    | -1.841                   | -0.056        | 4.52E-02   | ENSMUSG00000054083.8  | Capn12      |
| BINPACKER.1061.6     | -1.807                   | 1.943         | 4.93E-02   | no match              | -           |
| BINPACKER.17734.1    | -1.660                   | 2.109         | 4.94E-02   | ENSMUSG00000049608.8  | Gpr55       |
| <b>HIGH: DRY</b>     |                          |               |            |                       |             |
| <b>Transcript ID</b> | <b>log<sub>2</sub>FC</b> | <b>logCPM</b> | <b>FDR</b> | <b>Ensembl ID</b>     | <b>Gene</b> |
| BINPACKER.21794.1    | 2.434                    | 3.117         | 4.41E-08   | ENSMUSG00000020427.11 | Igfbp3      |
| BINPACKER.28731.1    | 2.484                    | 1.634         | 4.41E-08   | no match              | -           |
| BINPACKER.5662.4     | 2.061                    | 2.419         | 1.32E-07   | ENSMUSG00000019997.11 | Ctgf        |
| BINPACKER.87639.1    | 2.682                    | 0.345         | 1.96E-07   | ENSMUSG00000001768.15 | Rin2        |
| BINPACKER.35470.1    | 2.367                    | 1.786         | 1.89E-04   | no match              | -           |



|                    |       |        |          |                       |         |
|--------------------|-------|--------|----------|-----------------------|---------|
| BINPACKER.52106.1  | 2.096 | -0.542 | 6.83E-04 | no match              | -       |
| BINPACKER.3957.3   | 6.309 | 1.579  | 1.02E-03 | ENSMUSG00000019988.6  | Nedd1   |
| BINPACKER.116235.1 | 2.212 | 0.301  | 3.94E-03 | no match              | -       |
| BINPACKER.4449.4   | 3.428 | -0.538 | 6.74E-03 | ENSMUSG00000005150.16 | Wdr83   |
| BINPACKER.28.2     | 4.183 | 2.295  | 1.05E-02 | ENSMUSG00000075706.10 | Gpx4    |
| BINPACKER.56553.1  | 1.472 | 0.172  | 1.46E-02 | no match              | -       |
| BINPACKER.93518.1  | 1.711 | -0.793 | 1.57E-02 | no match              | -       |
| BINPACKER.11512.1  | 1.187 | 3.654  | 1.70E-02 | ENSMUSG00000031591.14 | Asah1   |
| BINPACKER.66588.1  | 1.851 | -0.347 | 1.71E-02 | no match              | -       |
| BINPACKER.42718.1  | 1.542 | 0.507  | 2.06E-02 | ENSMUSG00000030790.15 | Adm     |
| BINPACKER.49203.1  | 1.639 | -0.035 | 2.44E-02 | no match              | -       |
| BINPACKER.147548.1 | 1.744 | -0.007 | 2.99E-02 | ENSMUSG00000042757.15 | Tmem108 |
| BINPACKER.23756.2  | 1.265 | 3.468  | 3.01E-02 | ENSMUSG00000022061.8  | Nkx3-1  |
| BINPACKER.12709.1  | 3.906 | 2.611  | 3.01E-02 | ENSMUSG00000028639.14 | Ybx1    |
| BINPACKER.5280.2   | 3.874 | 0.257  | 3.76E-02 | ENSMUSG00000074582.10 | Arfgef2 |
| BINPACKER.58702.1  | 1.780 | -0.500 | 4.93E-02 | no match              | -       |

961

962

963

964 Table 4: DESeq2 determined significantly differentially expressed genes by treatment group in *P.*  
 965 *eremicus* testes. Of the 20 DGE with a  $-1 < \log_2 \text{fold change} > 1$ , 16 were significantly more highly  
 966 expressed in WET mice (High in WET) and four were more highly expressed in DRY mice (High in  
 967 DRY).

| Ensembl ID            | baseMean   | log <sub>2</sub> FC | p-adjusted | Gene ID | HIGH |
|-----------------------|------------|---------------------|------------|---------|------|
| ENSMUSG00000054200.6  | 8.77721485 | -2.2659204          | 1.24E-27   | Ffar4   | WET  |
| ENSMUSG00000026435.15 | 38.7630267 | -2.2184407          | 1.16E-42   | Slc45a3 | WET  |
| ENSMUSG00000079019.2  | 24.7158409 | -1.6454793          | 4.55E-13   | Insl3   | WET  |
| ENSMUSG00000031170.14 | 42.2322119 | -1.6434261          | 6.64E-15   | Slc38a5 | WET  |
| ENSMUSG00000038463.8  | 16.2605998 | -1.4619721          | 3.55E-12   | Olfml2b | WET  |
| ENSMUSG00000030830.18 | 22.0478661 | -1.4358002          | 3.41E-10   | Itgal   | WET  |
| ENSMUSG00000032554.15 | 67.5197473 | -1.3762549          | 7.26E-10   | Trf     | WET  |
| ENSMUSG00000021253.6  | 31.2493344 | -1.3551661          | 7.02E-14   | Tgfb3   | WET  |
| ENSMUSG00000030972.6  | 13.8934534 | -1.1709964          | 2.37E-07   | Acsm5   | WET  |
| ENSMUSG00000059991.7  | 173.025492 | -1.1528314          | 5.12E-11   | Nptx2   | WET  |
| ENSMUSG00000046687.5  | 44.9527785 | -1.0989949          | 8.31E-09   | Gm5424  | WET  |
| ENSMUSG00000024125.1  | 101.5876   | -1.0962074          | 9.77E-06   | Sbpl    | WET  |
| ENSMUSG00000021913.7  | 46.5401886 | -1.0876018          | 8.70E-07   | Ogdhl   | WET  |
| ENSMUSG00000015702.13 | 27.7002506 | -1.0603879          | 1.95E-05   | Anxa9   | WET  |
| ENSMUSG00000036596.6  | 6.6698922  | -1.0243046          | 9.04E-05   | Cpz     | WET  |
| ENSMUSG00000025172.2  | 13.2622565 | -1.0138171          | 0.00013318 | Ankrd2  | WET  |
| ENSMUSG00000042757.15 | 14.5676529 | 1.00643936          | 0.00019556 | Tmem108 | DRY  |
| ENSMUSG00000019997.11 | 64.49614   | 1.03331405          | 7.67E-05   | Ctgf    | DRY  |
| ENSMUSG00000020427.11 | 92.3763518 | 1.56656207          | 4.55E-13   | Igfbp3  | DRY  |
| ENSMUSG00000001768.15 | 12.3794312 | 1.72433255          | 8.16E-16   | Rin2    | DRY  |

968

969

970 Table 5: Functional information and chromosome (CHR) locations (*Mus musculus*) for the nine genes  
971 differentially expressed across all three analyses in *P. eremicus* testes by treatment group

| <b>Gene Name</b>                             | <b>Gene ID</b> | <b>Gene Function</b>                           | <b>CHR</b> | <b>HIGH</b> |
|----------------------------------------------|----------------|------------------------------------------------|------------|-------------|
| Insulin-like 3                               | Insl3          | testicular function and testicular development | 8          | WET         |
| Free-fatty acid receptor 4                   | Ffar4          | metabolism and inflammation                    | 19         | WET         |
| Solute carrier family 45 member 3            | Slc45a3        | sugar transport                                | 1          | WET         |
| Solute carrier family 48 member 5            | Slc38a5        | sodium-dependent amino acid transport          | X          | WET         |
| Integrin alpha L                             | Itgal          | lymphocyte-mediated immune responses           | 7          | WET         |
| Transferrin                                  | Trf            | iron transport and delivery to erythrocytes    | 9          | WET         |
| Ras and Rab Interactor 2                     | Rin2           | endocytosis and membrane trafficking           | 2          | DRY         |
| Insulin-like growth factor binding protein 3 | Igfbp3         | modulates effects of insulin growth factors    | 11         | DRY         |
| Connective tissue growth factor              | Ctgf           | fibrosis and extracellular matrix formation    | 10         | DRY         |

972

973

974 Figure 1: Correlation of  $\log_2$  fold change results for all Ensembl ID gene matches from DESeq2 and  
975 edgeR DGE analyses ( $\text{Adj-R}^2 = 0.6596$ ;  $F(1,14214) = 2.754 \times 10^4$ ;  $p < 2.2 \times 10^{-16}$ ).

976

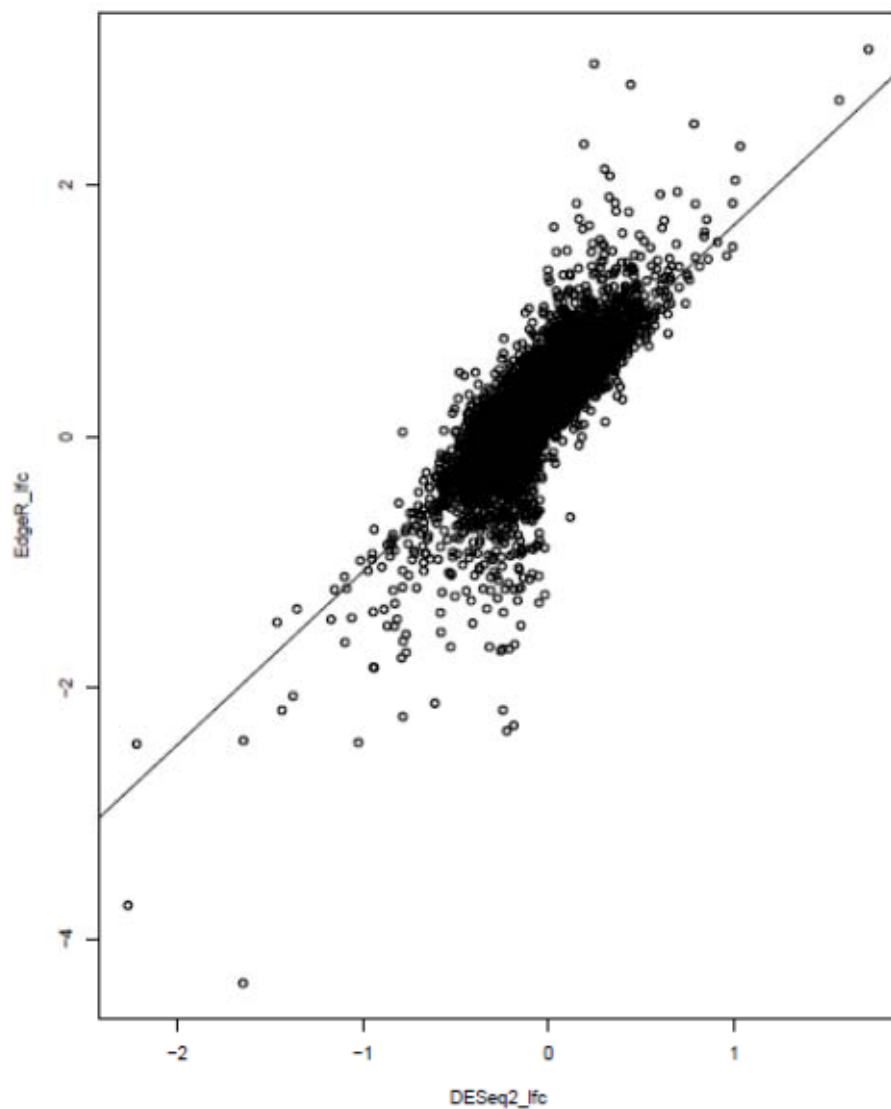

977

978

979

980

981

982

983 Figure 2: Box plots of edgeR analyzed differences in gene expression by treatment for the nine genes  
984 significantly differentially expressed in all three analyses. Counts per million (cpms) for both treatments  
985 (WET and DRY) are indicated.

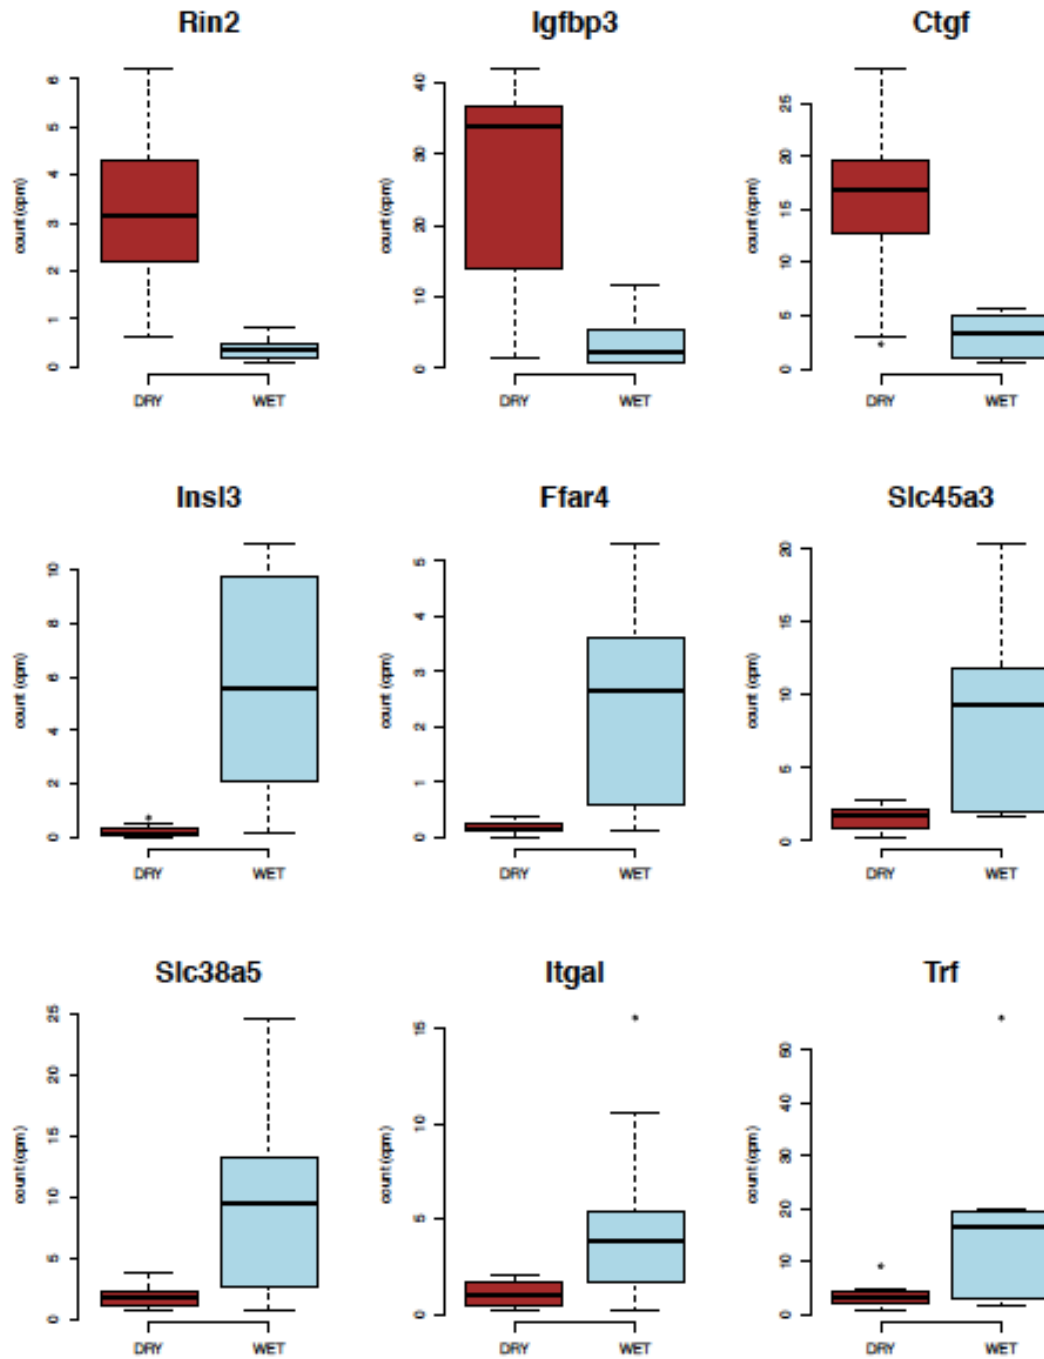

986

987 Figure 3: STRING diagrams of protein-protein interactions for genes significantly differentially  
988 expressed (highly expressed) in the WET treatment group. These six genes are (a) Slc38a5, (b) Slc45a3,  
989 (c) Insl3, (d) Ffar4 (also known as O3far1), (e) Itgal, and (f) Trf. Different colored circles stipulate  
990 different proteins interacting with the target proteins, small circles are proteins with unknown 3D  
991 structure, while larger circles are proteins with some degree of known or predicted 3D structure.  
992 Different colors of connecting lines represent different types of interactions between proteins. For fully  
993 interactive diagrams of the genes, view the provided links to string-db in the GitHub repository  
994 (StringDBlinks.md)

995

996

997 (a)

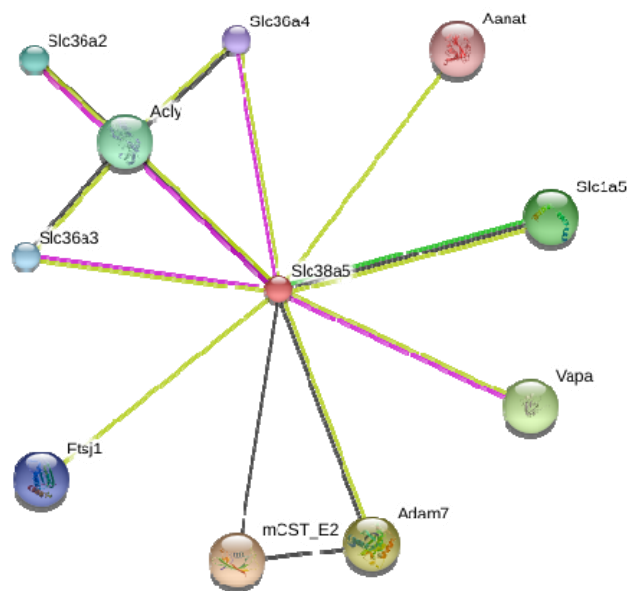

998

999

1000

1001

1002

1003

1004 (b)

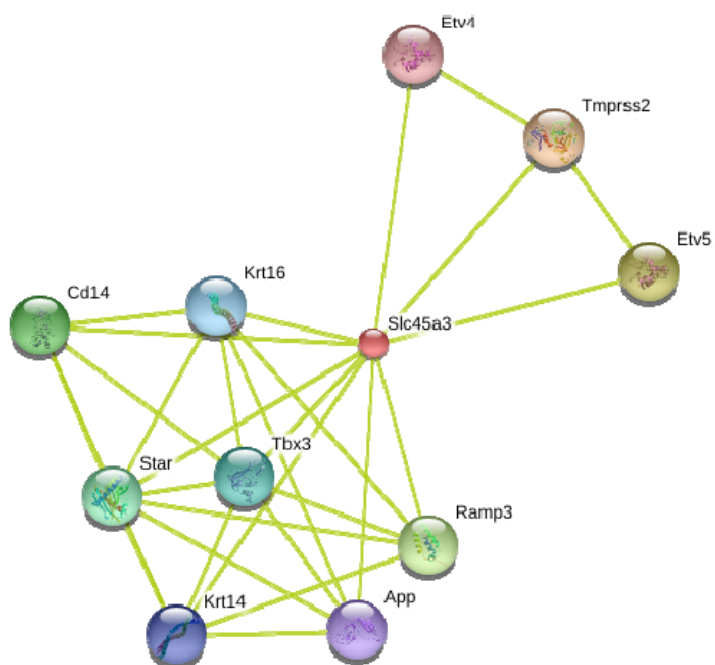

1005

1006 (c)

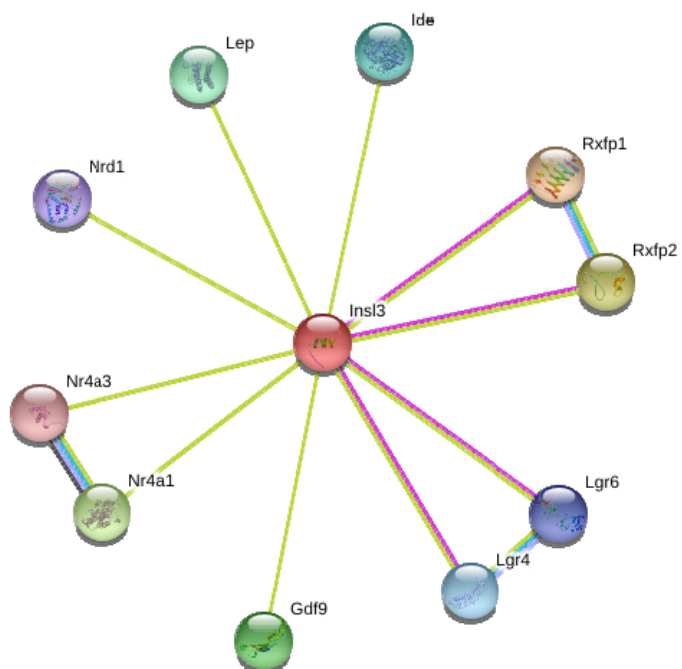

1007

1008

1009

1010

1011 (d)

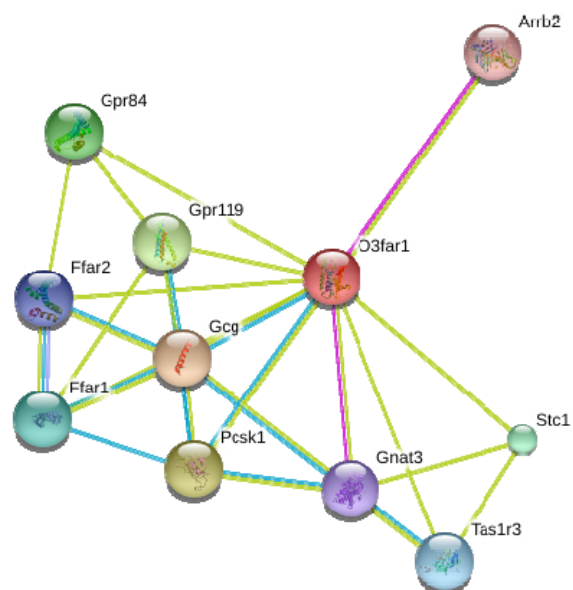

1012

1013 (e)

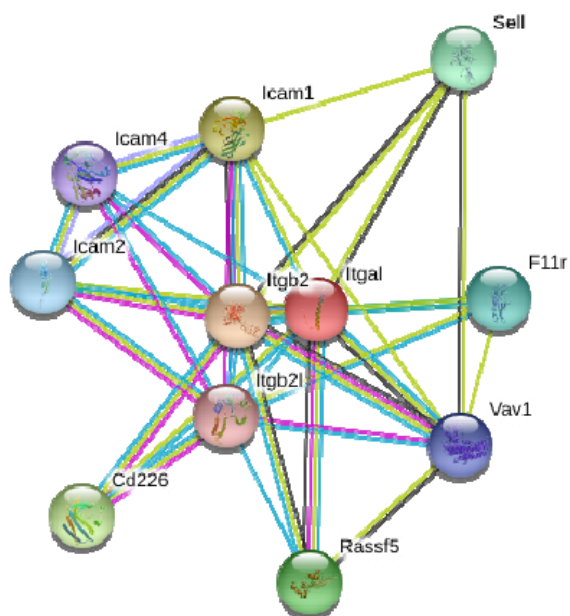

1014

1015

1016

1017

1018

1019



1020 (f)

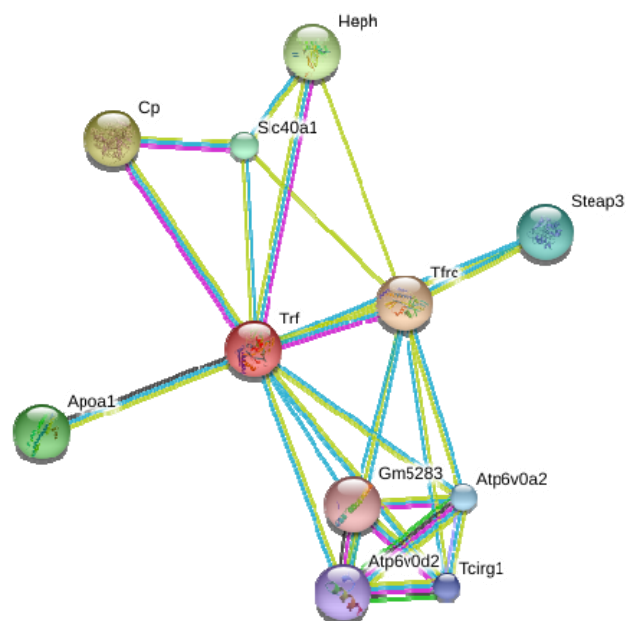

1021

1022

1023

1024

1025

1026

1027

1028

1029

1030

1031

1032

1033

1034

1035 Figure 4: STRING diagrams of protein-protein interactions for genes significantly differentially  
1036 expressed (highly expressed) in the DRY treatment group. These three genes are (a) Rin2, (b) Igfbp3,  
1037 and (c) Ctgf. Different colored circles stipulate different proteins interacting with the target proteins,  
1038 small circles are proteins with unknown 3D structure, while larger circles are proteins with some degree  
1039 of known or predicted 3D structure. Different colors of connecting lines represent different types of  
1040 interactions between proteins. For fully interactive diagrams of the genes, view the provided links to  
1041 string-db in the in the GitHub repository (StringDBlinks.md).

1042

1043 (a)

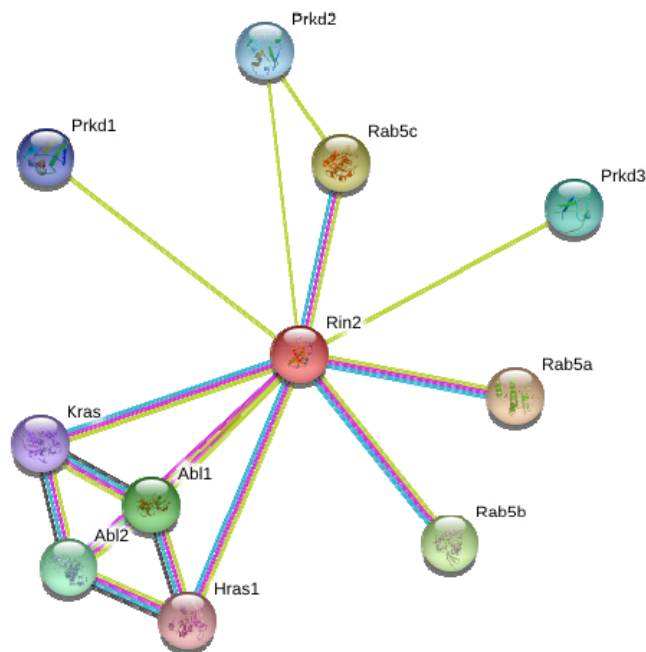

1044

1045

1046

1047

1048

1049

1050

1051 (b)

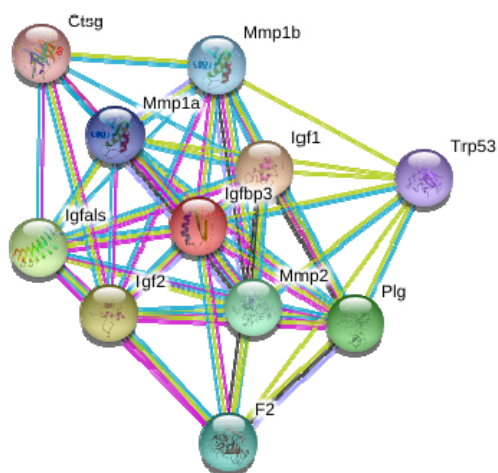

1052

1053 (c)

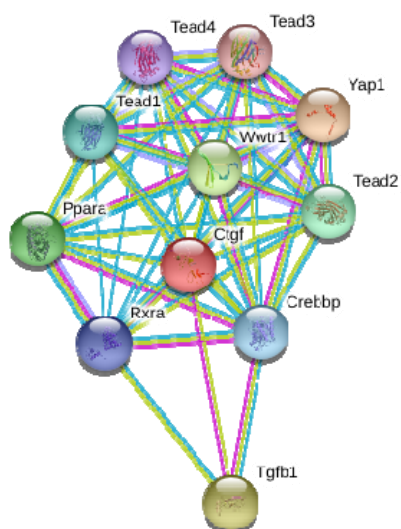

1054

1055

1056

1057

1058

1059

1060

1061

1062 Figure 5: Box plots of edgeR analyzed differences in gene expression by treatment for the nine *a priori*  
1063 tested reproductive hormone and hormone receptor genes. Counts per million (cpms) for both treatments  
1064 (WET and DRY) are indicated.

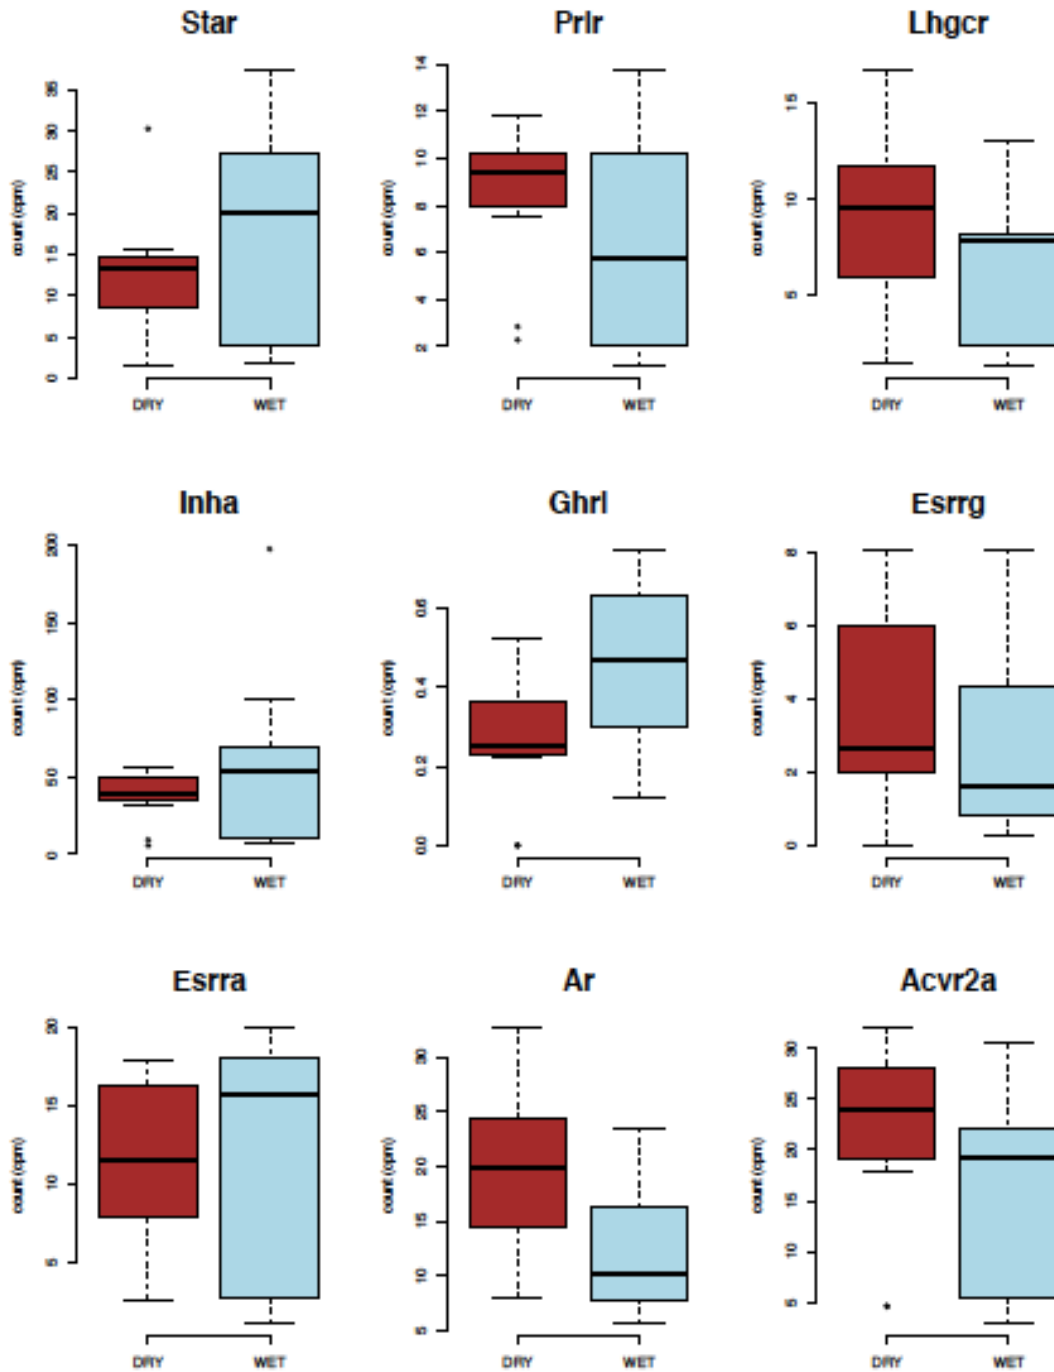

1065

1066

1067 Supplemental Table 1: Testes read data statistics, including sample identification (Mouse ID), number of  
1068 reads (# Reads), percent reads mapped to transcriptome (% Mapping), and treatment group (TRT).  
1069 Mouse ID 335T\* is the dataset which was used to assemble the testes transcriptome; therefore, these  
1070 reads were not used for the differential expression analysis.

| Mouse ID     | # Reads         | % Mapping    | TRT        |
|--------------|-----------------|--------------|------------|
| <b>335T*</b> | <b>45759114</b> | <b>85.46</b> | <b>wet</b> |
| 3333T        | 15135923        | 82.56        | Wet        |
| 2322T        | 12584407        | 82.37        | Dry        |
| 382T         | 14305186        | 83.87        | Dry        |
| 381T         | 14178847        | 83.23        | Wet        |
| 376T         | 14588175        | 82.56        | Dry        |
| 366T         | 13641731        | 82.95        | Wet        |
| 349T         | 17289781        | 85.93        | Wet        |
| 209T         | 11724617        | 84.02        | Dry        |
| 265T         | 11536510        | 84.17        | Dry        |
| 383T         | 13250034        | 81.46        | Dry        |
| 384T         | 12152820        | 82.75        | Dry        |
| 102T         | 11131941        | 84.84        | Wet        |
| 400T         | 13259393        | 83.98        | Wet        |
| 1357T        | 20603232        | 82.32        | Wet        |
| 1358T        | 12240814        | 86.58        | Wet        |
| 1359T        | 11144962        | 85.54        | Wet        |
| 13T          | 11075885        | 83.55        | Dry        |
| 343T         | 9423867         | 83.58        | Dry        |
| 344T         | 17146134        | 85.36        | Wet        |
| 355T         | 13948415        | 85.21        | Wet        |
| 888T         | 18890387        | 86.52        | Dry        |
| 999T         | 15213425        | 87.02        | Dry        |

1071  
1072 Supplemental Table 2: Significantly differentially expressed genes identified in the three analyses (DGE  
1073 in edgeR, DTE in edgeR, and DGE in DESeq2) by treatment group in *P. eremicus* testes. Of the 34

1074 different genes which were more highly expressed in WET mice, six were significant across all three  
 1075 analyses (Gene IDs are italicized). Of the 17 genes which were more highly expressed in DRY mice,  
 1076 three were significant across all three analyses (Gene IDs are italicized).

| <b>HIGH: WET</b> |                  |                  |                   |
|------------------|------------------|------------------|-------------------|
| <b>Gene ID</b>   | <b>DGE edgeR</b> | <b>DTE edgeR</b> | <b>DGE DESeq2</b> |
| <i>Insl3</i>     | x                | X                | x                 |
| <i>Ffar4</i>     | x                | X                | x                 |
| <i>Slc45a3</i>   | x                | X                | x                 |
| <i>Slc38a5</i>   | x                | X                | x                 |
| <i>Itgal</i>     | x                | X                | x                 |
| <i>Trf</i>       | x                | X                | x                 |
| Slit1            | x                | X                |                   |
| Cpz              |                  | X                | x                 |
| Tgfb3            |                  | X                | x                 |
| Ces1g            |                  | X                |                   |
| Ankrd2           |                  | X                | x                 |
| Nvl              |                  | X                |                   |
| Ogdhl            |                  | X                | x                 |
| Pfkfb4           |                  | X                |                   |
| Slc33a1          |                  | X                |                   |
| Anxa9            |                  | X                | x                 |
| Ddb2             |                  | X                |                   |
| St3gal1          |                  | X                |                   |
| Acsm5            |                  | X                | x                 |
| Cyp17a1          |                  | X                |                   |
| Olfml2b          |                  | X                | x                 |
| Pf4              |                  | X                |                   |
| Nptx2            |                  | X                | x                 |
| Dnah6            |                  | X                |                   |
| Sbpl             |                  | X                | x                 |

|                  |                  |                  |                   |
|------------------|------------------|------------------|-------------------|
| Adcy6            |                  | X                |                   |
| Gm5424           |                  | X                | x                 |
| Mbp              |                  | X                |                   |
| Fbxo2            |                  | X                |                   |
| Mycl             |                  | X                |                   |
| Eci1             |                  | X                |                   |
| Capn12           |                  | X                |                   |
| Col6a1           |                  | X                |                   |
| Gpr55            |                  | X                |                   |
| <b>HIGH: DRY</b> |                  |                  |                   |
| <b>Gene ID</b>   | <b>DGE edgeR</b> | <b>DTE edgeR</b> | <b>DGE DESeq2</b> |
| <i>Rin2</i>      | x                | X                | x                 |
| <i>Igfbp3</i>    | x                | X                | x                 |
| <i>Ctgf</i>      | x                | X                | x                 |
| Cyp2e1           | x                |                  |                   |
| Fmo2             | x                |                  |                   |
| Tnfrsf21         | x                |                  |                   |
| Cyp2f2           | x                |                  |                   |
| Dennd2d          | x                |                  |                   |
| Nedd1            |                  | X                |                   |
| Wdr83            |                  | X                |                   |
| Gpx4             |                  | X                |                   |
| Asah1            |                  | X                |                   |
| Adm              |                  | X                |                   |
| Tmem108          |                  | X                | x                 |
| Nkx3-1           |                  | X                |                   |
| Ybx1             |                  | X                |                   |
| Arfgef2          |                  | X                |                   |

1077 Supplemental Figure 1: Plot of edgeR determined differentially expressed genes. The 15 significant  
1078 genes are in red, with positive values indicating increased expression in the DRY group, and negative  
1079 values depicting increased expression in the WET group.

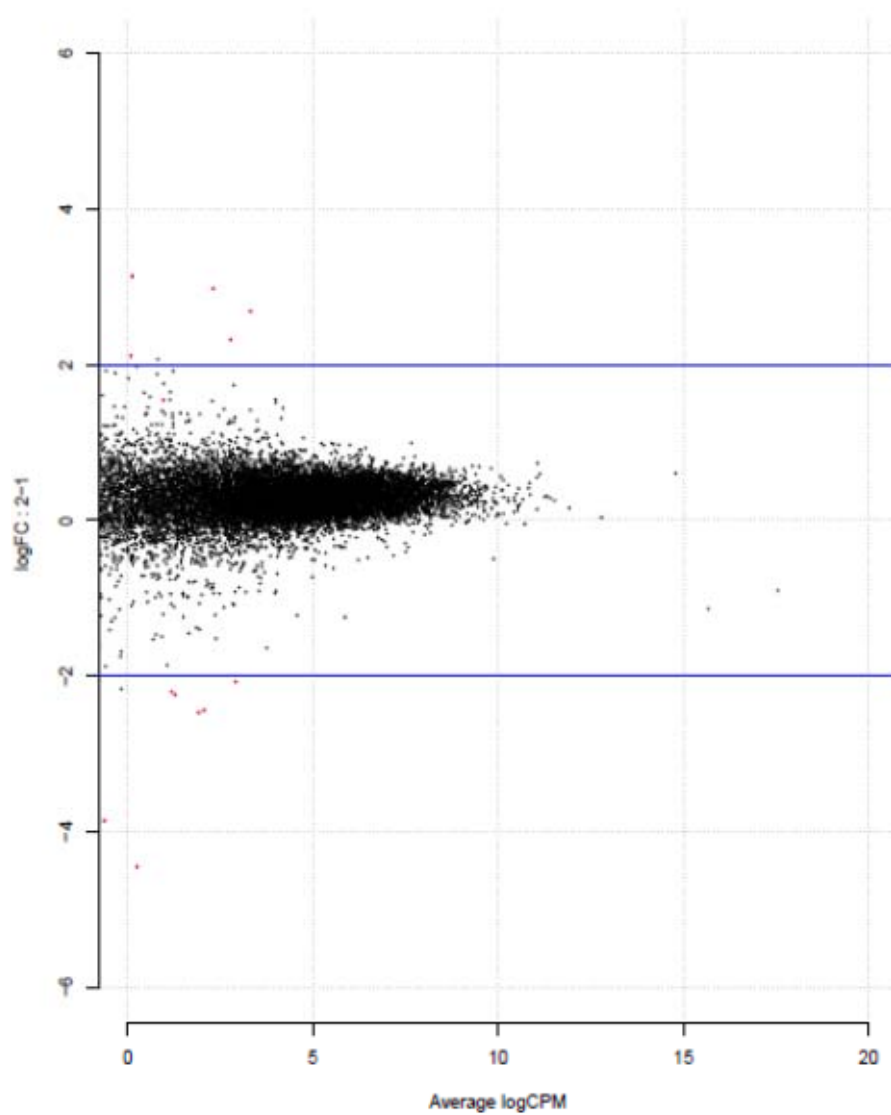

1080  
1081  
1082  
1083  
1084  
1085



1086 Supplemental Figure 2: Plot of edgeR determined differentially expressed transcripts. The 66 significant  
1087 transcripts are in red, with positive values indicating increased expression in the DRY group, and  
1088 negative values depicting increased expression in the WET group.

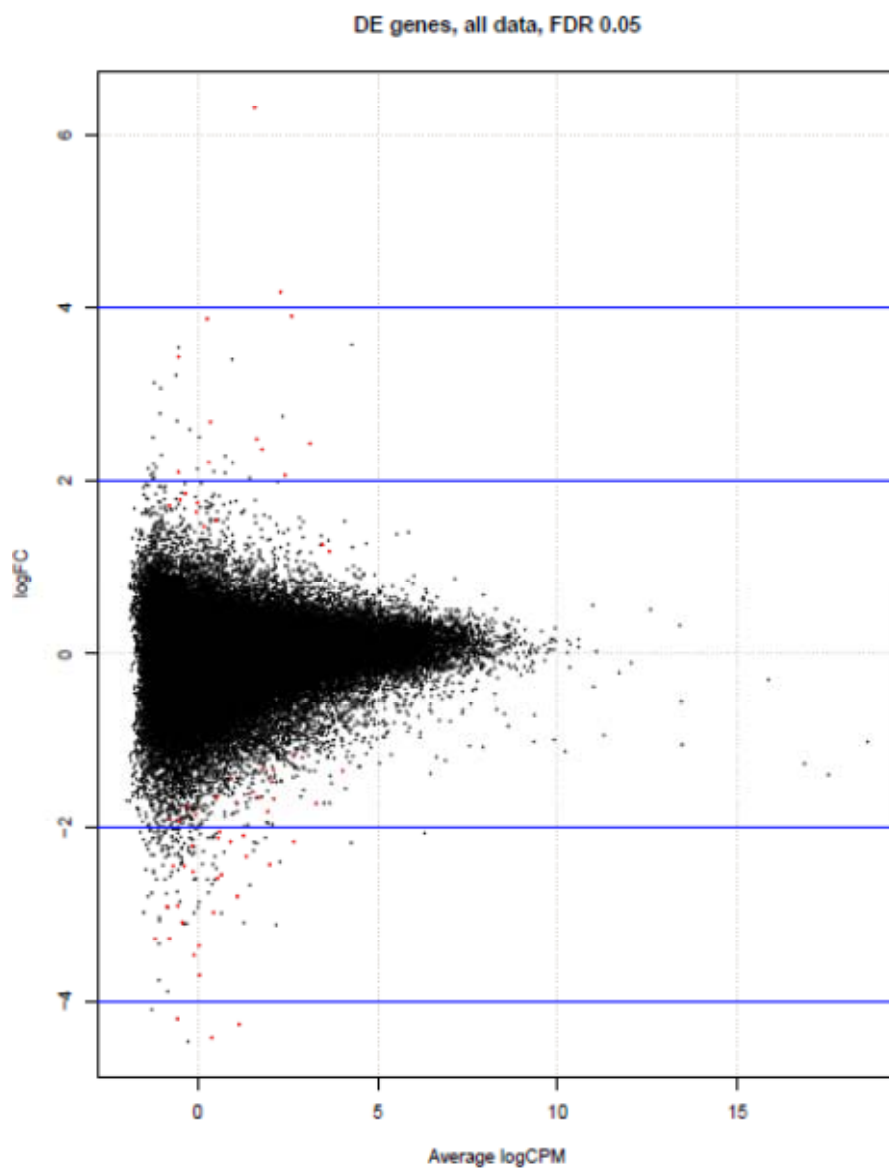

1089  
1090

1091 Supplemental Figure 3: Plot of DESeq2 determined differentially expressed transcripts. The 215  
1092 significant transcripts are in red, with positive values indicating increased expression in the DRY group,  
1093 and negative values depicting increased expression in the WET group.

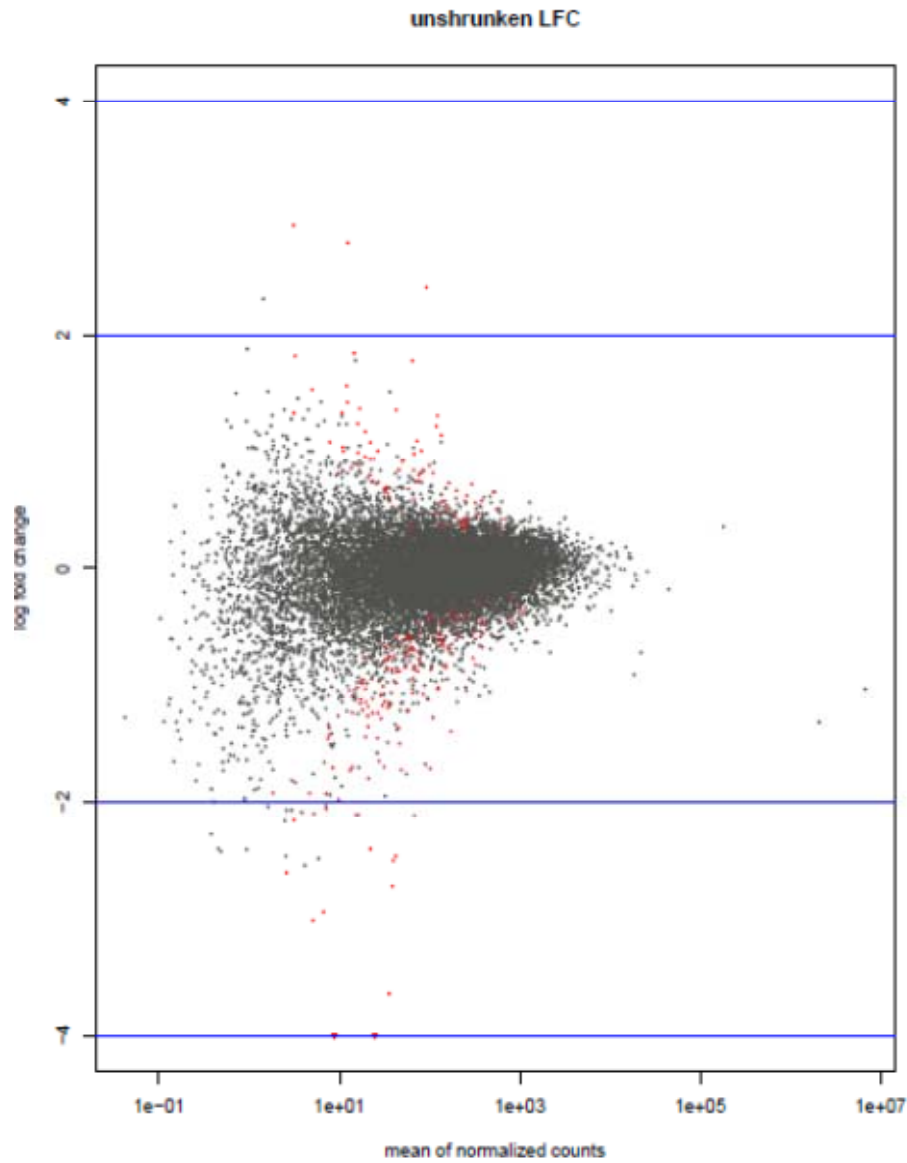

1094  
1095  
1096  
1097  
1098

- 1099 **Supplemental DropBox Files (will be submitted to Dryad upon acceptance):**
- 1100           Optimized final un-annotated transcriptome (good.BINPACKER.cdhit.fasta)
- 1101           Annotated transcriptome (good.BINPACKER.cdhit.fasta.dammit.fasta)
- 1102           Dammit gff3 file of annotation (good.BINPACKER.cdhit.fasta.dammit.gff3)
- 1103           Salmon folder including salmon quant outputs for 22 individuals (salmon)
- 1104           Salmon merged quant file (NEWmergedcounts.txt)
- 1105           Gene ID by Transcript ID matrix (NEWESTfinalMUS.txt)
- 1106           Transcripts without matches from edgeR DTE analysis (DTEno-matchBLASTnSequences.md)
